# Supplementary material
Source: PubMed Central journal article supplement (PMC4545236)
Supplement: NIHMS712604-supplement-Supplementary_Figures_and_Tables.pdf [file NIHMS712604-supplement-Supplementary_Figures_and_Tables.pdf]

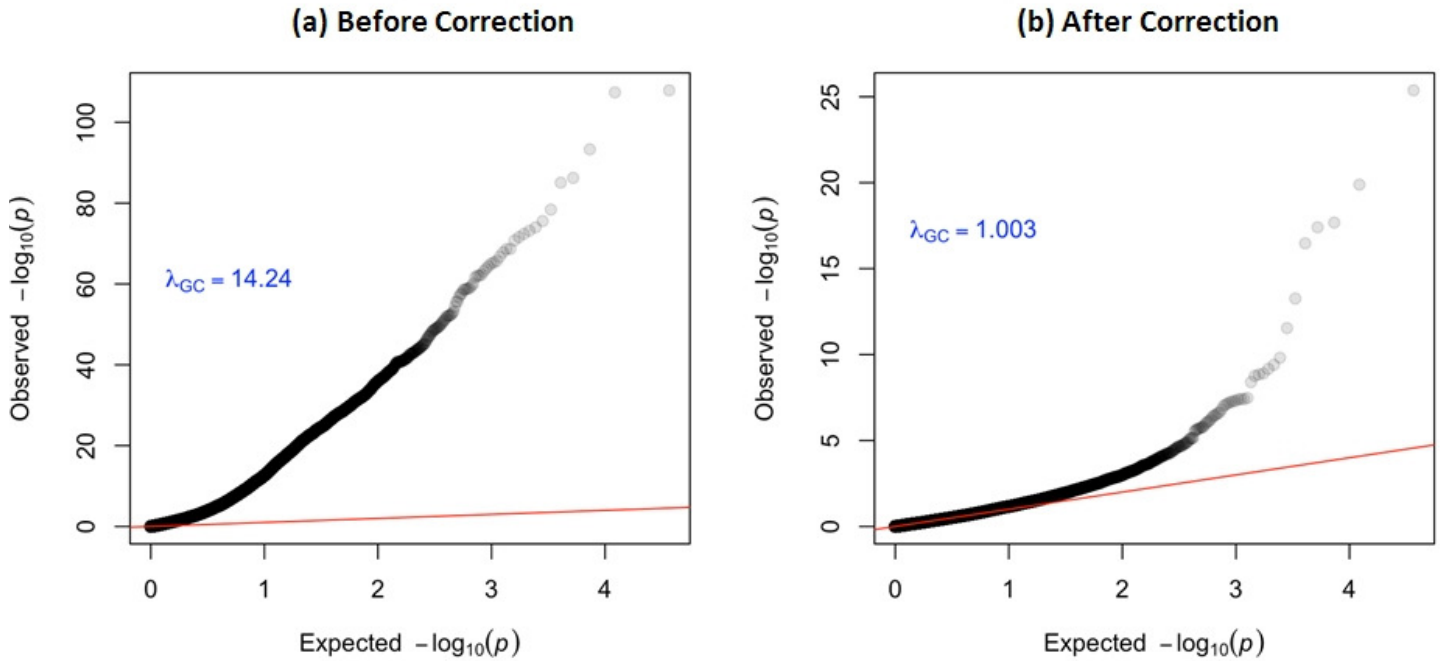

### Supplementary Figure 1

#### Effect of correction for population structure in the genome-wide association study.

Quantile-quantile (QQ) plots showing the effect of the genetic relatedness between samples on the GWAS, before and after correction. The expected distribution of  $P$  values ( $x$  axis) is compared to that of observed values ( $y$  axis) across all tested SNPs, and the genomic inflation factor  $\lambda_{GC}$  is indicated. **(a)**  $P$ -value distributions before correction, showing very high inflation due to population structure. **(b)**  $P$ -value distributions after using a genetic relatedness matrix as a covariate in the analysis, a correction resulting in a significant decrease in the inflation factor. Note that the  $y$ -axis scales are different in the two plots.

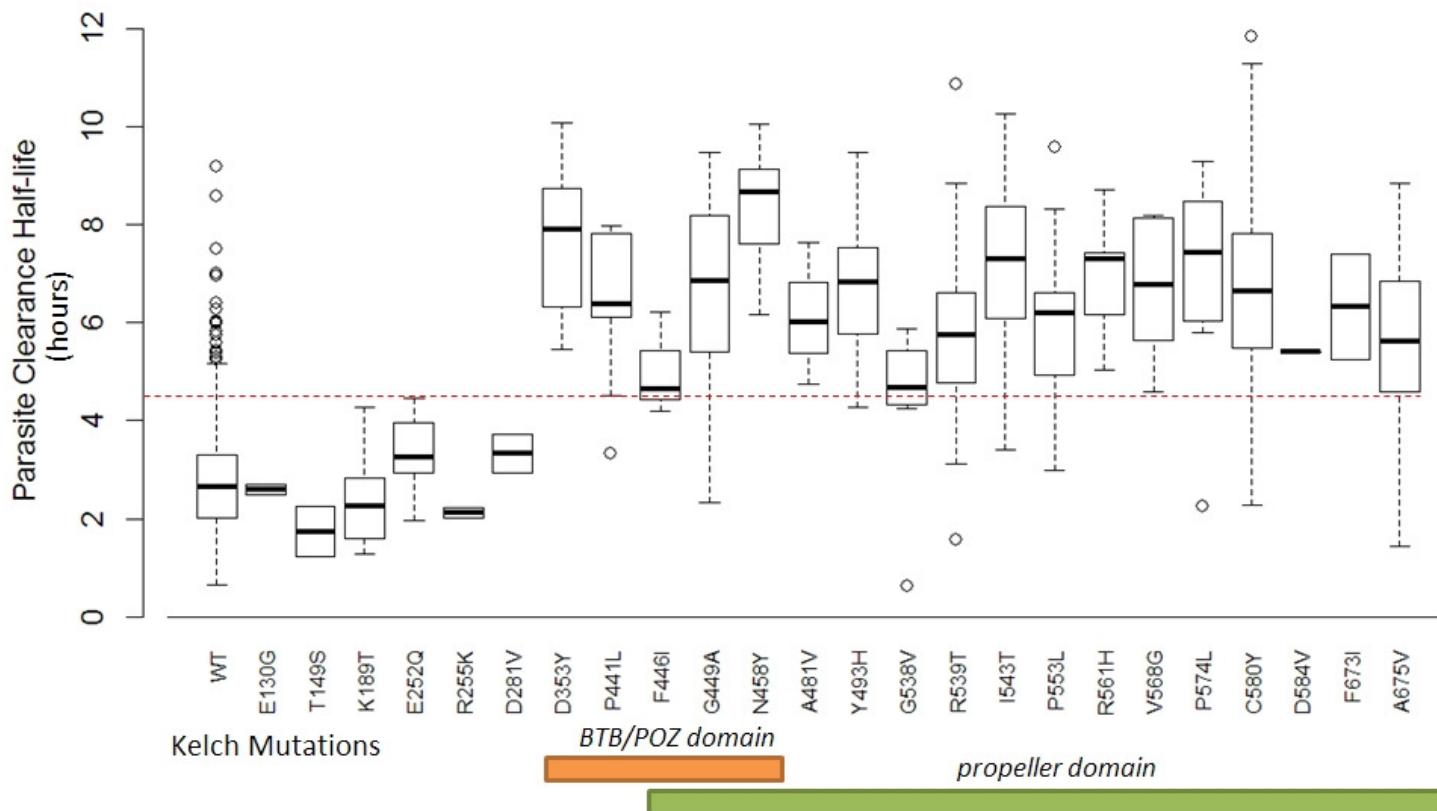

**Supplementary Figure 2**

**Distributions of parasite clearance half-life ( $PCt_{1/2}$ ) for different *kelch13* mutations.**

$PCt_{1/2}$  values for samples carrying 1 of 24 mutant *kelch13* alleles ( $n = 469$ ) are compared to those carrying wild-type (WT) alleles ( $n = 630$ ); samples with heterozygous or missing calls were excluded ( $n = 190$ ). Alleles carried by a single sample are excluded from this diagram ( $n = 8$ ). Plots show median, interquartile range, estimated 95% confidence interval and outlying values. A red dotted line shows  $PCt_{1/2} = 4.5$  h, a notional boundary of clinical artemisinin resistance. Below the x axis, colored bands identify those mutations occurring in either the BTB/BOZ domain or the propeller domain.

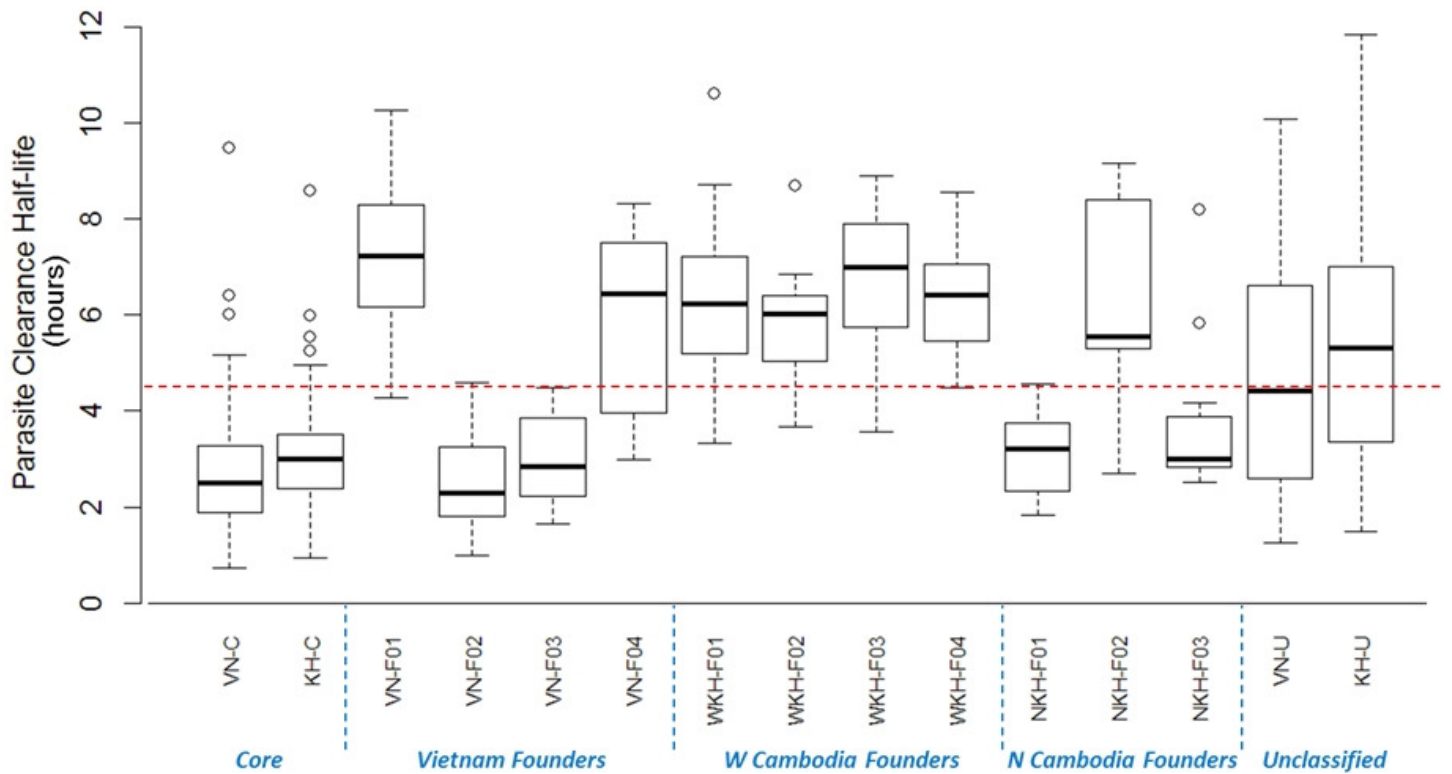

**Supplementary Figure 3**

**Distributions of parasite clearance half-life in core and founder populations in Vietnam and Cambodia.**

Distributions of parasite clearance half-life ( $PC_{t_{1/2}}$ ) in all parasite subpopulations identified in Vietnam and Cambodia (**Supplementary Tables 5–8**) are shown by box plots indicating median, interquartile range, estimated 95% confidence interval and outlying values. A red horizontal dotted line indicates  $PC_{t_{1/2}} = 4.5$  h, a notional boundary between sensitive and resistant phenotypes. Two founder populations in Vietnam (VN-F02 and VN-F03) and two in northern Cambodia (NKH-F01 and NKH-F03) comprise artemisinin-sensitive parasites, whereas the remaining founder populations are artemisinin resistant.

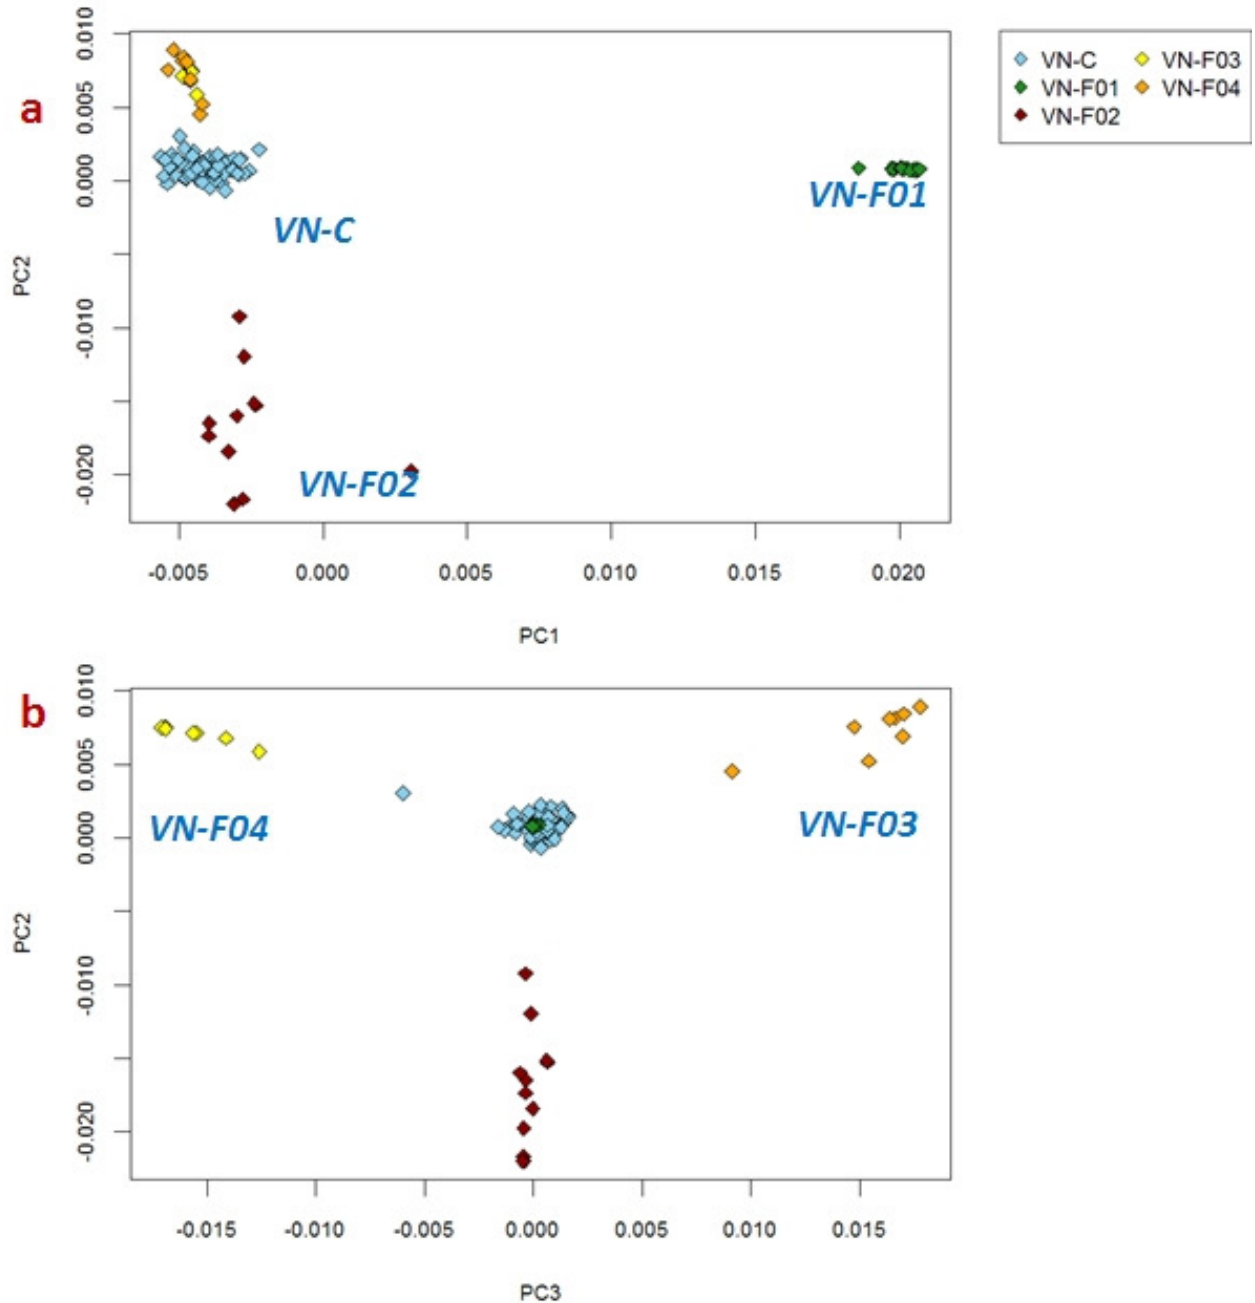

**Supplementary Figure 4**

**Correspondence of Vietnamese founder populations with PCoA outlier groups.**

In this PCoA analysis, Vietnamese samples are colored according to their assigned population. The plots show different components for the same sample set: **(a)** PC1 versus PC2 and **(b)** PC2 versus PC3. Unclassified samples (VN-U) are omitted for clarity. There is a strong correspondence between the founder populations identified by ancestry analysis and the outlier groups emerging from these plots (indicated by blue labels).

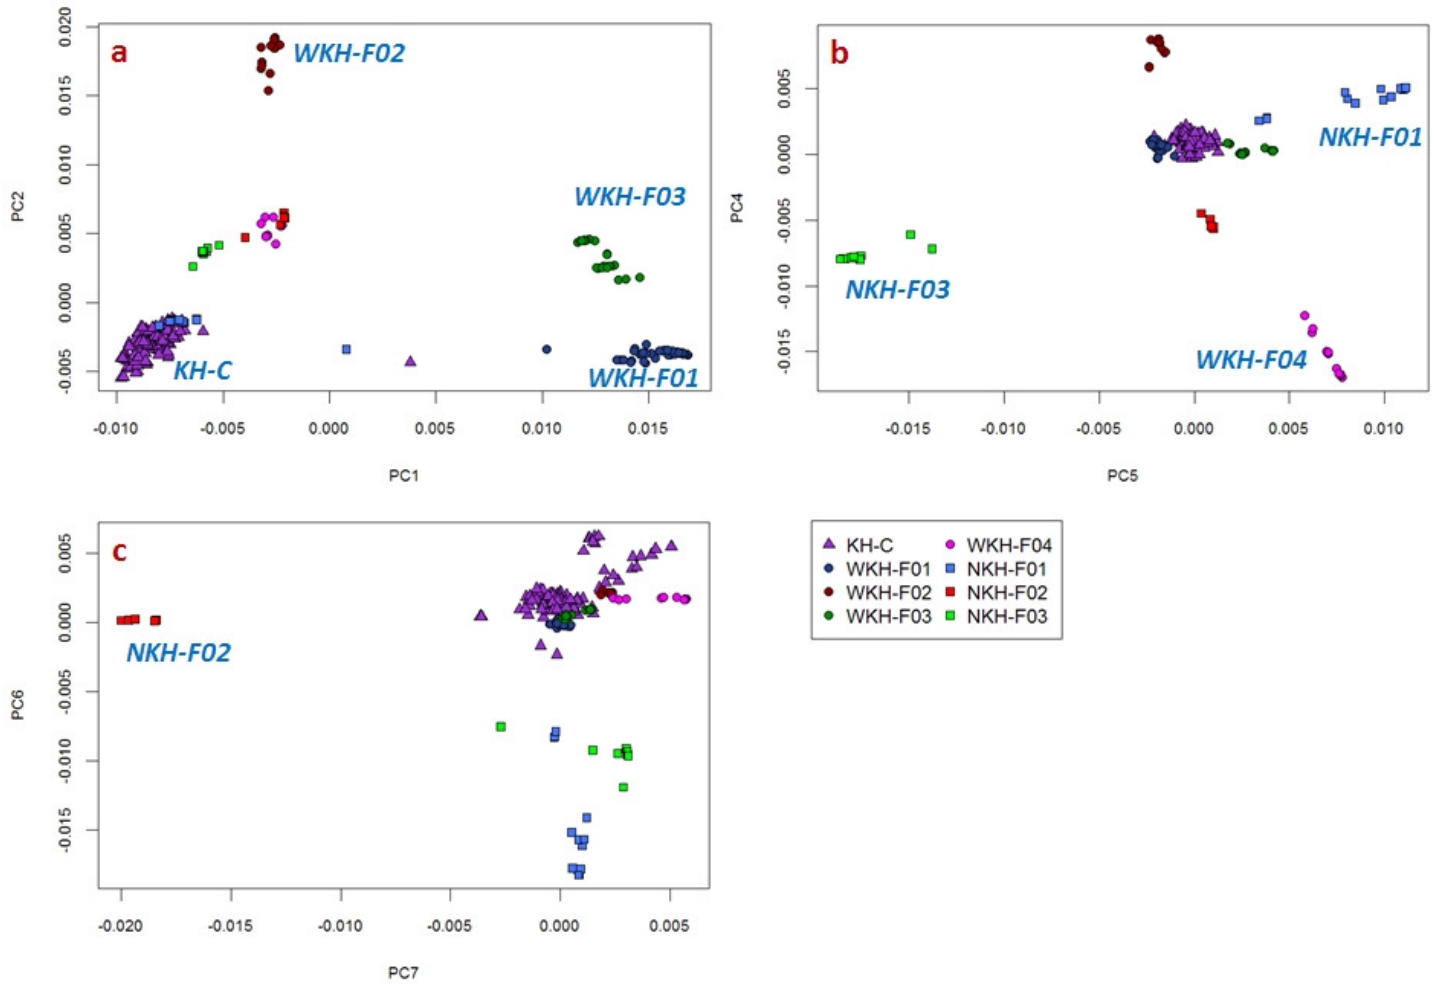

**Supplementary Figure 5**

**Correspondence of Cambodian founder populations with PCoA outlier groups.**

In this PCoA analysis, Cambodian samples are colored according to their assigned population. The plots show different components for the same sample set: **(a)** PC1 versus PC2, **(b)** PC4 versus PC5 and **(c)** PC6 versus PC7. Unclassified samples (KH-U) are omitted for clarity. There is a strong correspondence between the founder populations identified by ancestry analysis and the outlier groups emerging from these plots (indicated by blue labels).

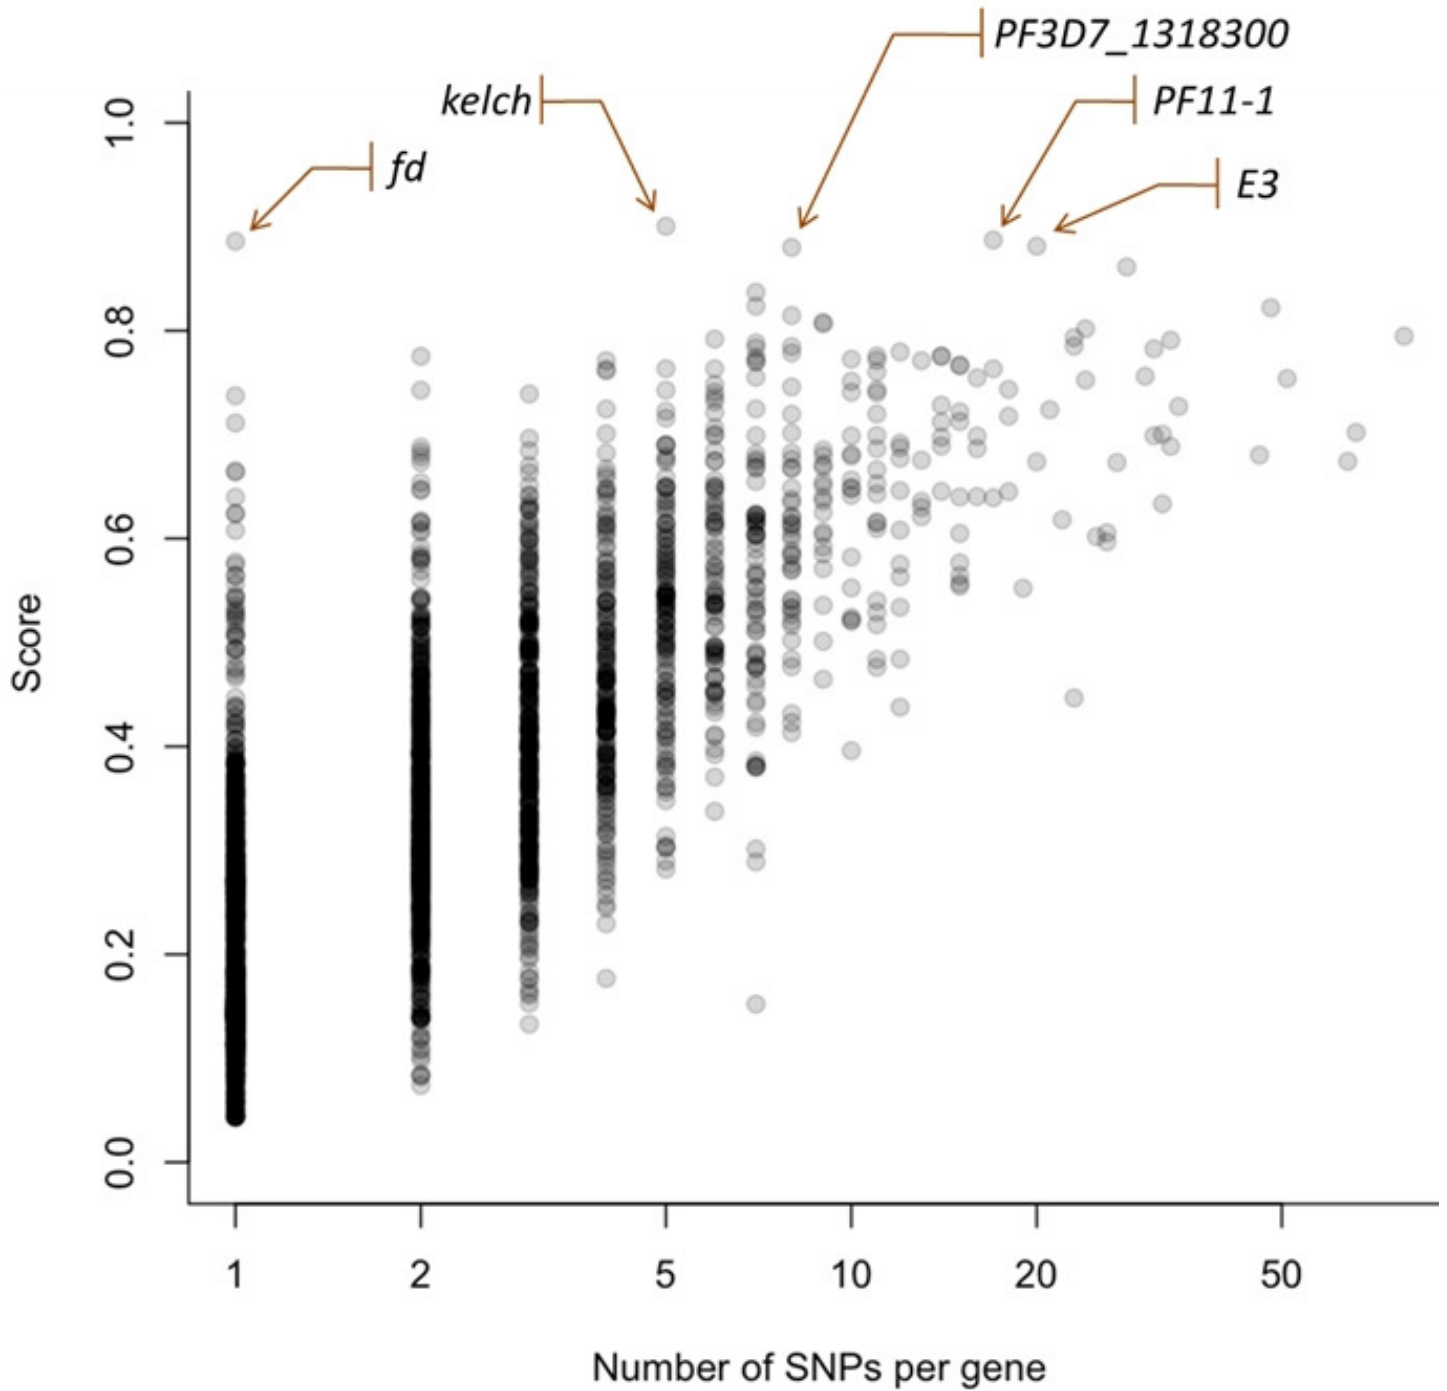

**Supplementary Figure 6**

**Distribution of gene heteroallelic scores of founder population differentiation.**

For each gene, the  $F_{ST}$  value between each founder population and its corresponding core population was estimated, and the gene was assigned a score equal to the mean of all  $F_{ST}$  estimates. Scores in 2,518 genes analyzed are plotted against the number of SNPs with  $F_{ST} \geq 0.3$  in the gene, showing that scores tend to rise with SNP counts. Points corresponding to the top five genes in this analysis are labeled.

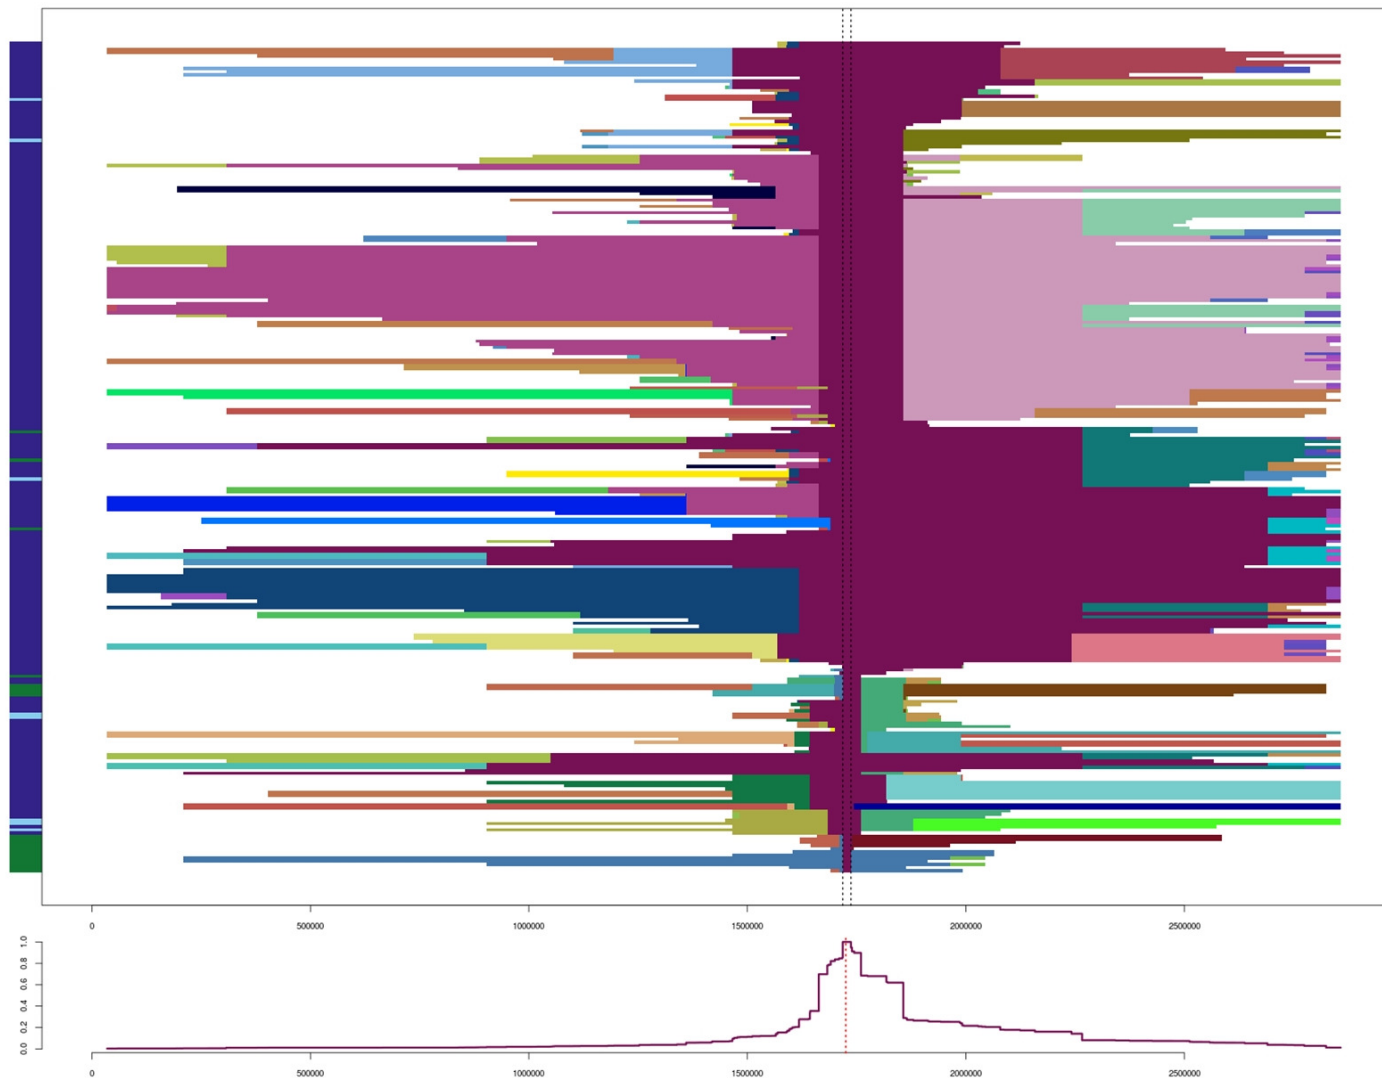

**Supplementary Figure 7**

**Decay of haplotypes on chromosome 13 in samples carrying the C580Y *kelch13* mutation.**

In the top panel, each horizontal line represents a haplotype, and each color is used to signify a shared haplotype (i.e., carrying identical genotypes). On the left-hand side, colored bars indicate the country of origin of the sample (blue, Cambodia; cyan, Vietnam; green, Thailand). Two vertical dashed lines mark a 17-kb core region that is identical in all samples. Haplotype homozygosity decay is reported in the bottom panel; a red dashed line marks the position of the C580Y allele. In the upper part of the plot, clusters in ESEA present extremely long haplotypes (sometimes chromosome-wide), consistent with rapid population expansions. These clusters share a sizeable core haplotype, suggesting a common origin of their C580Y mutations. By comparison, the haplotype shared with C580Y mutants from western Thailand (bottom of the plot) is far shorter, suggesting an independent origin of the mutation in the two regions.

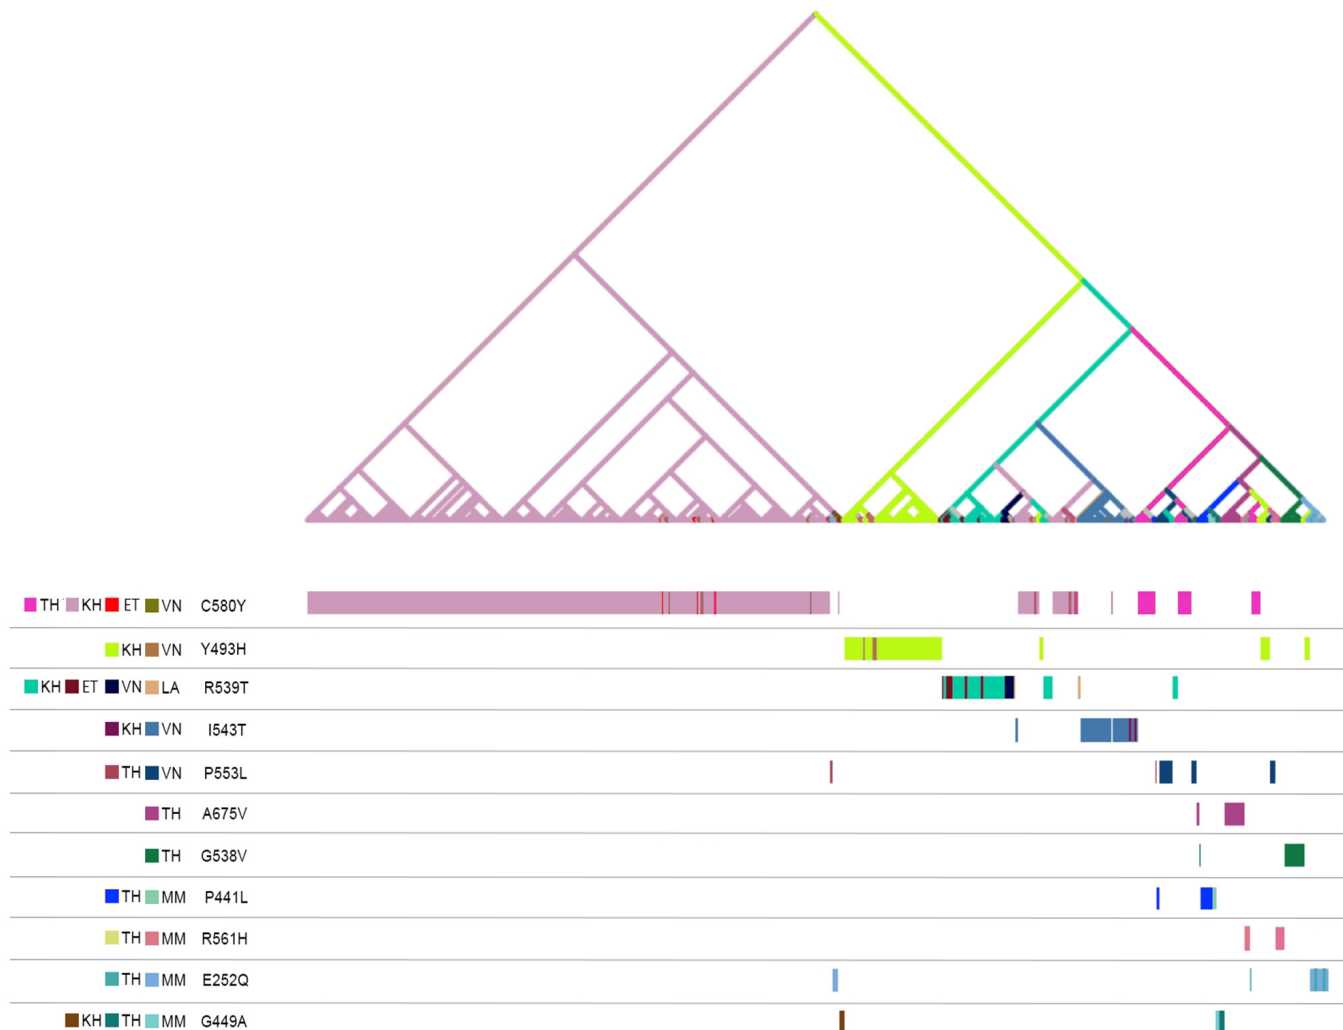

**Supplementary Figure 8**

**Pairwise longest common haplotype length tree for samples containing *kelch13* mutations, tips colored by mutation and country of origin.**

Tips represent samples and have been colored by mutation and country of origin (KH, Cambodia; VN, Vietnam; LA, Laos; TH, western Thailand; ET, eastern Thailand; MM, Myanmar). Internal branches have been colored by the most frequent mutation present in the subtended subtrees. The bars at the bottom offer visual aid for tracking how different mutations cluster and segregate across the tree.



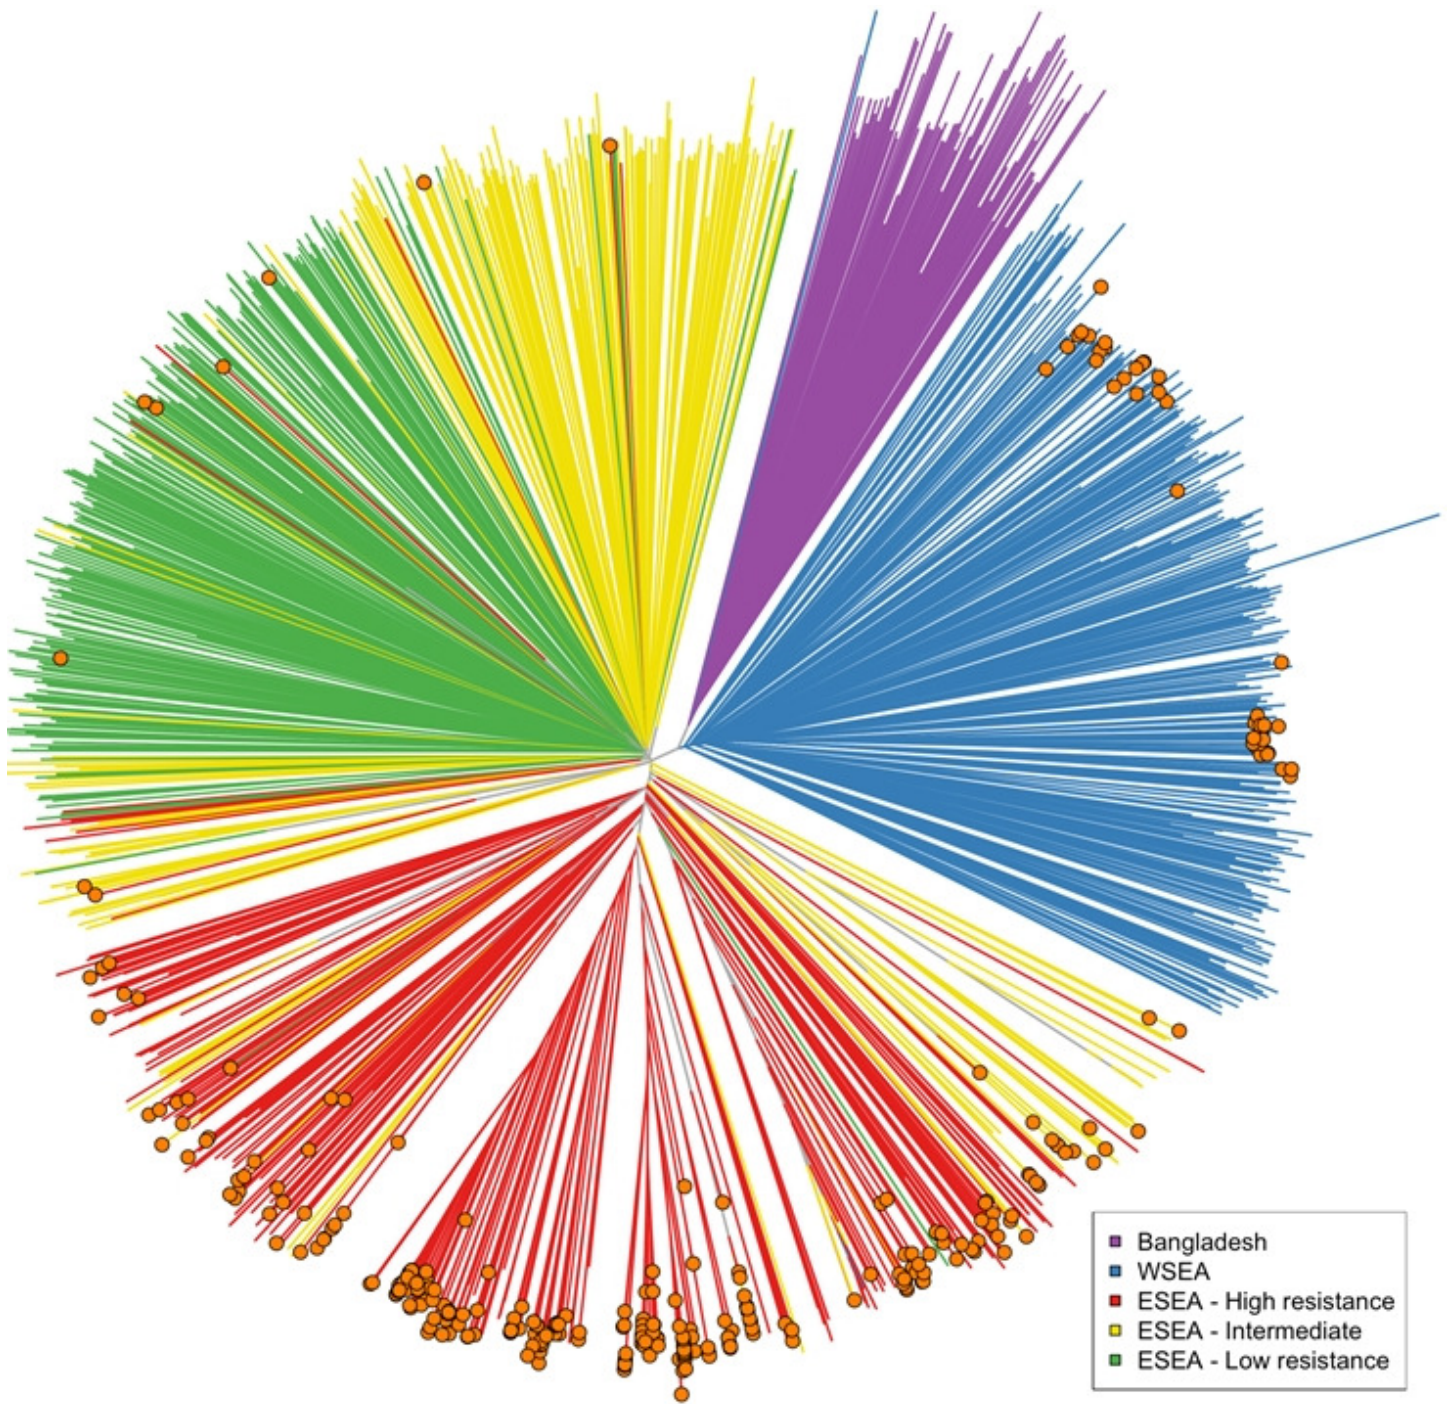

**Supplementary Figure 9**

**Neighbour-joining tree showing samples carrying the *kelch13* C580Y mutation.**

Analogous to **Figure 3a**, this neighbour-joining tree shows samples colored by their population compartments. Orange tip symbols denote samples carrying the *kelch13* C580Y mutation.

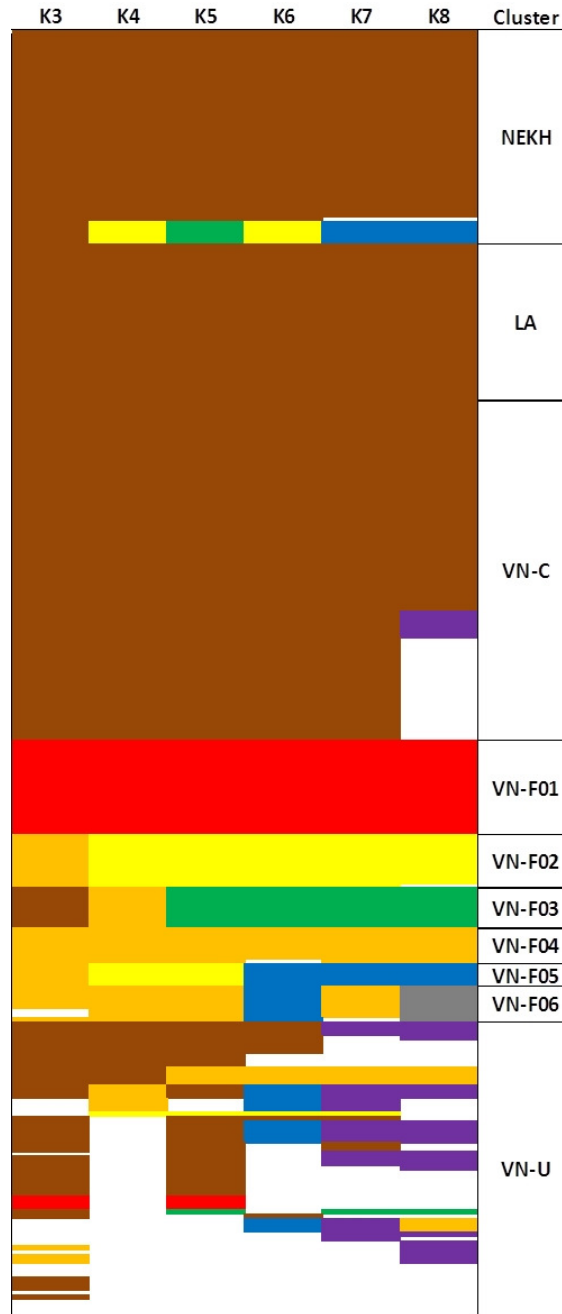

**Supplementary Figure 10**

**Ancestry analysis of Vietnamese populations.**

The figure shows the ancestry assignments for each sample, under six different hypotheses of ancestor numbers ( $k = 3$  to  $8$ ). Each row corresponds to a sample, and the colors in the first six columns indicate group assignments under each hypothesis, as detailed in the **Supplementary Note**; each color represents one group, corresponding to one of the  $k$  ancestries, while unclassified samples are shown in white. Vietnamese samples that grouped together across all hypotheses (one mismatch allowed) were grouped into clusters if these clusters comprised  $\geq 5$  samples (labeled VN-C and VN-F01 to VN-F06); other Vietnamese samples were assigned to an 'unclassified' group (VN-U). The VN-C cluster was identified by similarity with the Cambodian and Laotian populations (NEKH and LA, respectively).

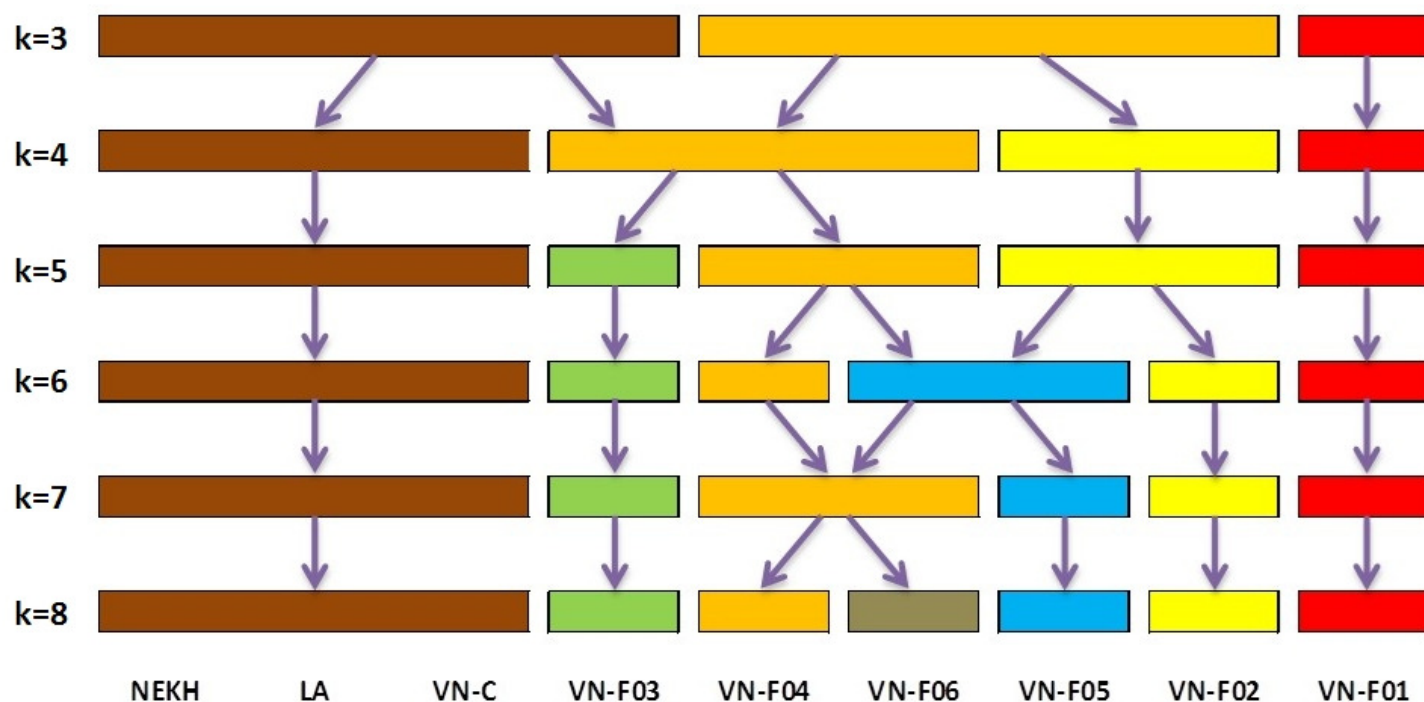

Supplementary Figure 11

**Cluster stability analysis of Vietnamese populations.**

The diagram shows the relationships between the clusters identified for different hypotheses, using the sample assignments shown in **Supplementary Figure 10**. Non-core populations separate at different values of  $k$ , e.g. at  $k = 3$  (VN-F01) and  $k = 4$  (VN-F02, VN-F03 and VN-F04). Cluster VN-F01 is remarkably stable, reflecting a high degree of differentiation, and the classifications of clusters VN-F02, VN-F03 and VN-F04 also appear consistent across different values of  $k$ . Conversely, clusters VN-F05 and VN-F06 appear to aggregate with different groups as  $k$  increases, suggesting that they may not represent a stable subpopulation. This effect is possibly aggravated by the very small size of these clusters.

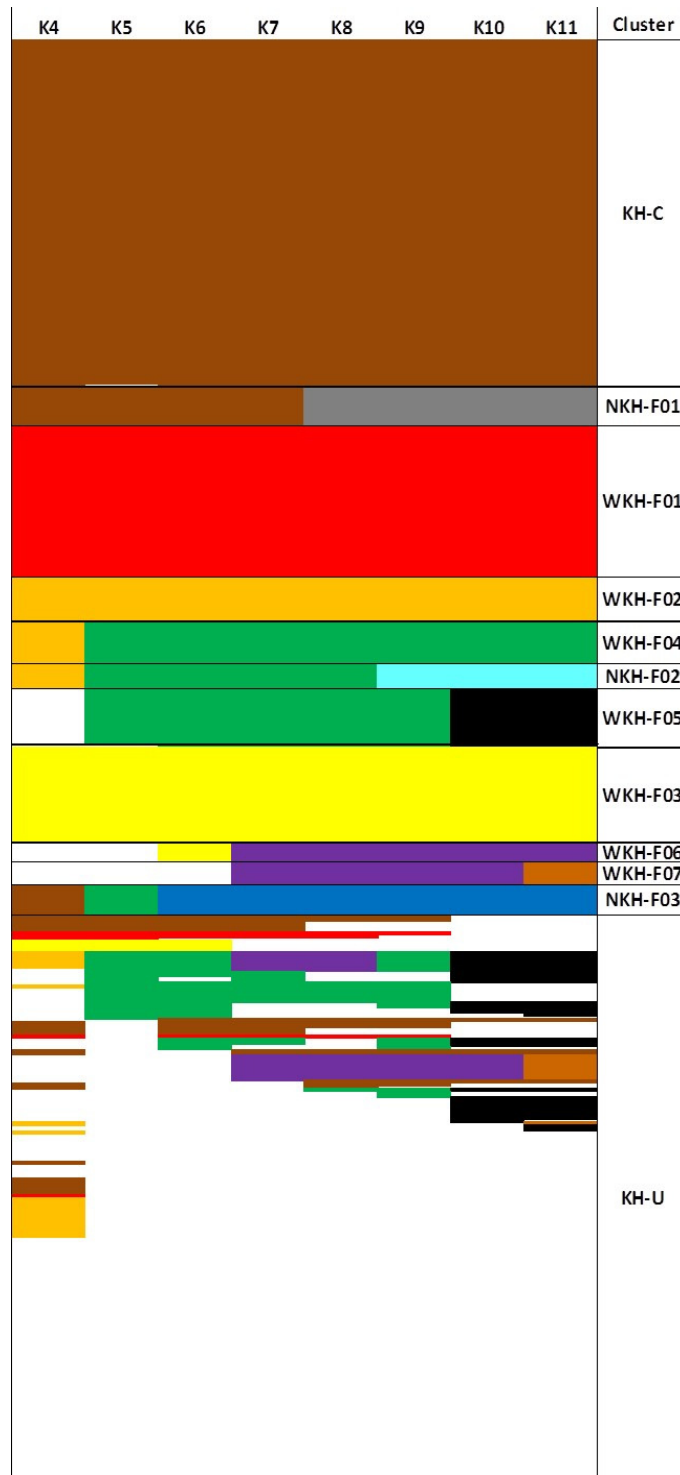

**Supplementary Figure 12**

**Ancestry analysis of Cambodian populations.**

The figure shows the ancestry assignments for each sample, under eight different hypotheses of ancestor numbers ( $k = 4$  to  $8$ ). The method and coloring scheme are the same as for **Supplementary Figure 10**.

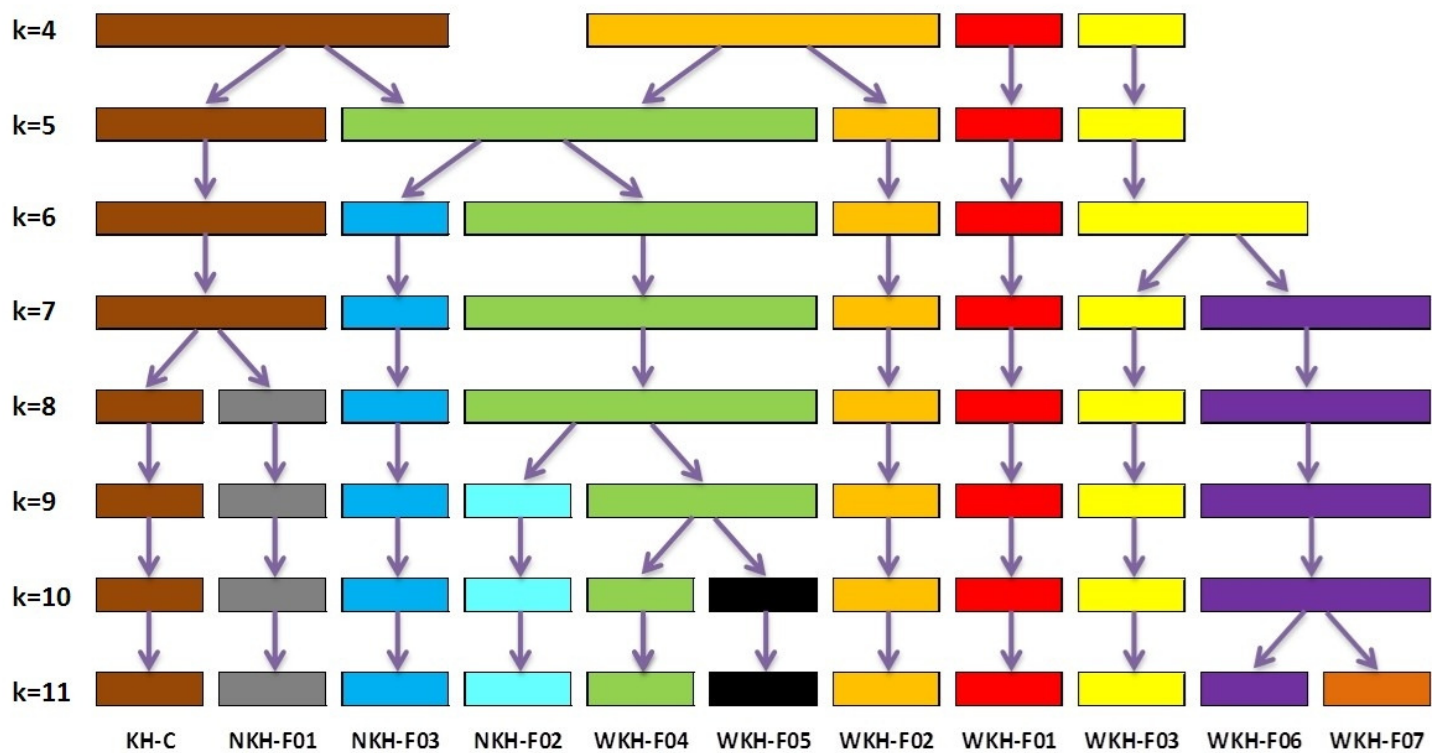

**Supplementary Figure 13**

**Cluster stability analysis of Cambodian populations.**

The diagram shows the relationships between the clusters identified for different hypotheses, using the sample assignments shown in **Supplementary Figure 12**. The smaller clusters KH-F06 and KH-F07 were deemed unstable and discarded, as they comprise samples that were unclassified for  $k = 6$ , as well as samples previously grouped with KH-F03.

CV error for different values of K

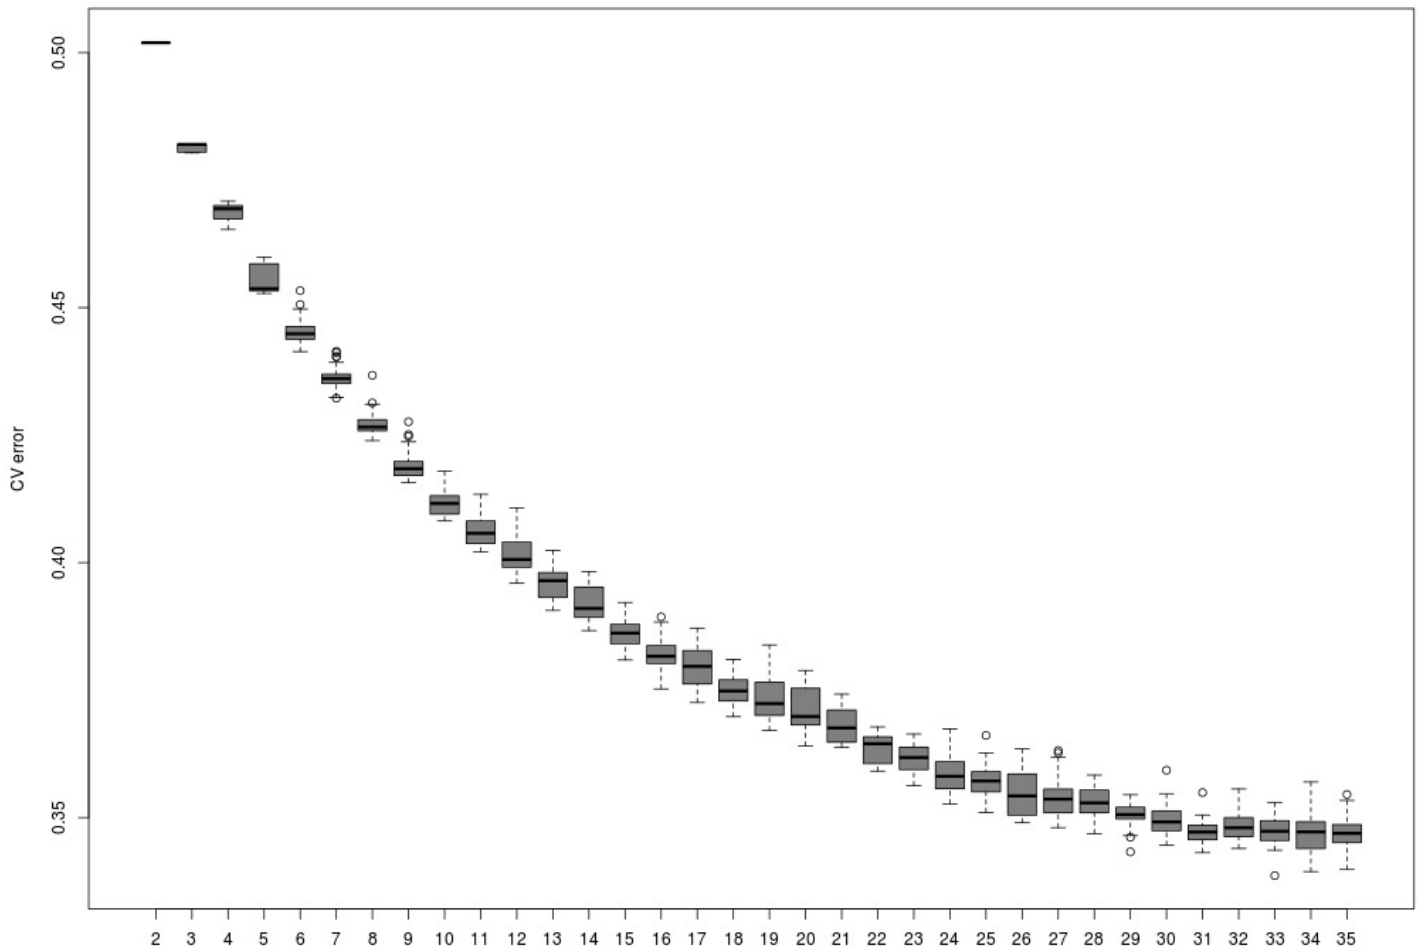

Supplementary Figure 14

**Cross-validation (CV) error distribution for Cambodian populations.**

This figure shows the CV error distribution of 50 ADMIXTURE runs with different random seeds for each value of K. As K increases, the CV error reaches a plateau with no clear minimum; solutions show marginal improvements, while error variance grows.

## Supplementary Tables

**Supplementary Table 1 – Additional samples whose genomes were included in population structure studies, but not in the genome-wide association study (GWAS).** These samples were contributed by various studies participating in the MalariaGEN *Plasmodium falciparum* Community Project (for further details, see <http://www.malariagen.net/projects/parasite/pf>). Contributors are abbreviated as follows: ARC3 – Artemisinin Resistance Confirmation, Characterization and Containment;<sup>1,2</sup> ARCE – Containment of Artemisinin Tolerant Malaria Parasites in Southeast Asia Project;<sup>3-5</sup> MORU – Mahidol-Oxford Research Unit, Bangkok, Thailand;<sup>6</sup> SMRU – Shoklo Malaria Research Unit, Mae Sot, Thailand;<sup>7</sup> Texas Biomed – Texas Biomedical Research Institute, San Antonio, TX, USA;<sup>8</sup> UMD/HHMI – University of Maryland School of Medicine, Howard Hughes Medical Institute, Baltimore, MD, USA;<sup>1</sup> OUCRU – Oxford University Clinical Research Unit, Ho Chi Minh City, Vietnam;<sup>3</sup> NIAID/NIH – National Institute of Allergy and Infectious Diseases, National Institutes of Health, Bethesda, MD, USA;<sup>9,10</sup> TRAC – Tracking Resistance to Artemisinin Collaboration.<sup>11</sup> Abbreviations used in this paper to indicate the respective geographical regions are shown in the “Code” column.

| Contributor             | Years   | Country (Region)     | Code | Locations     | Samples    |
|-------------------------|---------|----------------------|------|---------------|------------|
| MORU/SMRU, Texas Biomed | 2001-08 | Thailand (West)      | WTH  | Mae Sot       | 108        |
| MORU                    | 2007    | Cambodia (West)      | WKH  | Pailin        | 3          |
| ARC3                    | 2008-09 | Bangladesh           | BD   | Bandarban     | 29         |
|                         |         | Cambodia (West)      | WKH  | Pailin        | 35         |
|                         |         |                      |      | Tasanh        | 49         |
|                         |         | Thailand (West)      | WTH  | Mae Sot       | 3          |
| UMD/HHMI                | 2009    | Cambodia (West)      | WKH  | Pailin        | 15         |
| OUCRU                   | 2009-10 | Vietnam              | VN   | Binh Phuoc    | 19         |
| ARCE                    | 2010-11 | Laos                 | LA   | Xepon         | 36         |
|                         |         | Myanmar (South)      | SMM  | Kawthaung     | 50         |
|                         |         | Vietnam              | VN   | Binh Phuoc    | 108        |
| NIAID/NIH (*)           | 2008-10 | Cambodia (West)      | WKH  | Pursat        | 67         |
|                         |         | Cambodia (Northeast) | NEKH | Ratanakiri    | 4          |
| TRAC (*)                | 2011-13 | Myanmar (Central)    | CMM  | Bago Division | 1          |
|                         |         | Laos                 | LA   | Attapeu       | 8          |
|                         |         | Thailand (West)      | WTH  | Mae Sot       | 3          |
|                         |         | Cambodia (West)      | WKH  | Pursat        | 3          |
| <b>Total</b>            |         |                      |      |               | <b>541</b> |

(\*) Samples not included in the GWAS because phenotypes were not available.

**Supplementary Table 2 – SNPs showing the most significant associations in the genome-wide association study (GWAS).** This table includes all SNPs with  $P \leq 10^{-5}$  ( $n = 48$ ), ordered by their genomic coordinates. SNPs significant with a Bonferroni-corrected threshold ( $P \leq 10^{-7}$ ) are shown in bold type. For each SNP, we show chromosome number; nucleotide position; rank of the SNP in the GWAS; gene id and description; whether the SNP is non-synonymous or synonymous; the mutation name; and the association  $P$ -value.

| Chr | Pos            | Rank      | Gene Id              | Gene Description                                            | N/S      | Mutation      | $P$             |
|-----|----------------|-----------|----------------------|-------------------------------------------------------------|----------|---------------|-----------------|
| 5   | 852479         | 47        | PF3D7_0520800        | conserved Plasmodium protein, unknown function              | N        | S1183N        | 7.56E-06        |
|     | 855646         | 37        | PF3D7_0520800        | conserved Plasmodium protein, unknown function              | S        | 127N          | 1.70E-06        |
| 7   | <b>405362</b>  | <b>13</b> | <b>PF3D7_0709000</b> | <b>chloroquine resistance transporter (CRT)</b>             | <b>N</b> | <b>N326S</b>  | <b>1.73E-09</b> |
|     | <b>405600</b>  | <b>10</b> | <b>PF3D7_0709000</b> | <b>chloroquine resistance transporter (CRT)</b>             | <b>N</b> | <b>I356T</b>  | <b>6.85E-10</b> |
|     | <b>896660</b>  | <b>9</b>  | <b>PF3D7_0720700</b> | <b>phosphoinositide-binding protein, putative</b>           | <b>N</b> | <b>C1484F</b> | <b>3.95E-10</b> |
| 8   | 392003         | 25        | PF3D7_0807600        | conserved Plasmodium protein, unknown function              | N        | N578D         | 1.56E-07        |
|     | 481897         | 48        | PF3D7_0809600        | peptidase family C50, putative                              | N        | K5162N        | 9.01E-06        |
|     | 497184         | 43        | PF3D7_0809600        | peptidase family C50, putative                              | N        | I67L          | 2.96E-06        |
|     | 789468         | 41        | PF3D7_0817300        | asparagine-rich antigen                                     | N        | K50R          | 2.38E-06        |
|     | 1392729        | 36        | PF3D7_0832200.1      | Plasmodium exported protein (PHISTa-like), unknown function | N        | T152I         | 1.66E-06        |
| 9   | 973634         | 39        | PF3D7_0924000        | patatin-like phospholipase, putative                        | N        | K363E         | 2.04E-06        |
|     | 973647         | 33        | PF3D7_0924000        | patatin-like phospholipase, putative                        | N        | G367E         | 8.32E-07        |
|     | 973686         | 35        | PF3D7_0924000        | patatin-like phospholipase, putative                        | N        | I380N         | 1.22E-06        |
|     | 1055456        | 34        | PF3D7_0926100        | protein kinase, putative                                    | N        | D787E         | 9.32E-07        |
| 10  | 490648         | 28        | PF3D7_1012700        | protein phosphatase, putative                               | N        | Y1133N        | 3.24E-07        |
|     | <b>490720</b>  | <b>23</b> | <b>PF3D7_1012700</b> | <b>protein phosphatase, putative</b>                        | <b>N</b> | <b>V1157L</b> | <b>7.93E-08</b> |
| 12  | 497461         | 31        | PF3D7_1012900        | conserved Plasmodium protein, unknown function              | N        | T38I          | 5.89E-07        |
|     | 739074         | 46        | PF3D7_1218800        | conserved Plasmodium protein, unknown function (PSOP17)     | N        | R194K         | 7.52E-06        |
| 13  | <b>748395</b>  | <b>5</b>  | <b>PF3D7_1318100</b> | <b>ferredoxin, putative</b>                                 | <b>N</b> | <b>D193Y</b>  | <b>3.37E-17</b> |
|     | <b>754133</b>  | <b>11</b> | <b>PF3D7_1318300</b> | <b>conserved Plasmodium protein, unknown function</b>       | <b>N</b> | <b>T75I</b>   | <b>1.24E-09</b> |
|     | <b>958469</b>  | <b>22</b> | <b>PF3D7_1322700</b> | <b>conserved Plasmodium protein, unknown function</b>       | <b>N</b> | <b>T236I</b>  | <b>6.88E-08</b> |
|     | <b>1700345</b> | <b>20</b> | <b>PF3D7_1343100</b> | <b>conserved Plasmodium protein, unknown function</b>       | <b>N</b> | <b>N96D</b>   | <b>5.26E-08</b> |
|     | <b>1717359</b> | <b>3</b>  | <b>PF3D7_1343400</b> | <b>DNA helicase, putative</b>                               | <b>N</b> | <b>N821K</b>  | <b>2.10E-18</b> |
|     | <b>1718288</b> | <b>4</b>  | <b>PF3D7_1343400</b> | <b>DNA helicase, putative</b>                               | <b>N</b> | <b>N1131I</b> | <b>3.94E-18</b> |
|     | <b>1725259</b> | <b>1</b>  | <b>PF3D7_1343700</b> | <b>kelch protein, putative</b>                              | <b>N</b> | <b>C580Y</b>  | <b>4.24E-26</b> |



| Chr       | Pos            | Rank      | Gene Id                | Gene Description                                                            | N/S      | Mutation      | P               |
|-----------|----------------|-----------|------------------------|-----------------------------------------------------------------------------|----------|---------------|-----------------|
|           | <b>1739315</b> | <b>15</b> | <b>PF3D7_1343800</b>   | <b>conserved Plasmodium protein, unknown function</b>                       | <b>S</b> | <b>4724N</b>  | <b>3.34E-08</b> |
|           | <b>1820881</b> | <b>24</b> | <b>PF3D7_1345400</b>   | <b>conserved Plasmodium protein, unknown function</b>                       | <b>S</b> | <b>140T</b>   | <b>9.65E-08</b> |
|           | 1821294        | 44        | PF3D7_1345400          | conserved Plasmodium protein, unknown function                              | N        | D3H           | 7.09E-06        |
|           | <b>1862741</b> | <b>17</b> | <b>PF3D7_1346400</b>   | <b>conserved Plasmodium protein, unknown function</b>                       | <b>N</b> | <b>D3282H</b> | <b>3.88E-08</b> |
|           | 1913206        | 30        | PF3D7_1347900          | conserved Plasmodium protein, unknown function                              | N        | T1814A        | 4.17E-07        |
|           | 1988624        | 29        | PF3D7_1349500          | conserved Plasmodium protein, unknown function                              | N        | D2331N        | 3.51E-07        |
|           | <b>1991685</b> | <b>14</b> | <b>PF3D7_1349500</b>   | <b>conserved Plasmodium protein, unknown function</b>                       | <b>S</b> | <b>1310K</b>  | <b>4.03E-09</b> |
|           | 2015894        | 42        | PF3D7_1350500          | conserved Plasmodium protein, unknown function                              | N        | D970N         | 2.43E-06        |
|           | <b>2028330</b> | <b>21</b> | <b>PF3D7_1350900</b>   | <b>transcription factor with AP2 domain(s) (ApiAP2)</b>                     | <b>S</b> | <b>103L</b>   | <b>5.69E-08</b> |
|           | 2600019        | 26        | PF3D7_1364600          | aldo-keto reductase, putative                                               | S        | 421P          | 2.29E-07        |
|           | 1481740        | 27        | PF3D7_1436300          | translocon component PTEX150 (PTEX150)                                      | N        | D655A         | 2.61E-07        |
|           | <b>1956225</b> | <b>8</b>  | <b>PF3D7_1447900</b>   | <b>multidrug resistance protein 2+(heavy metal transport family) (MDR2)</b> | <b>N</b> | <b>T484I</b>  | <b>1.53E-10</b> |
|           | 1960049        | 40        | PF3D7_1448000          | U3 snoRNA-associated small subunit rRNA processing protein, putative        | N        | H1271R        | 2.06E-06        |
|           | <b>2079623</b> | <b>16</b> | <b>PF3D7_1450700</b>   | <b>conserved Plasmodium protein, unknown function</b>                       | <b>N</b> | <b>T379I</b>  | <b>3.86E-08</b> |
|           | 2081506        | 32        | PF3D7_1450800          | conserved Plasmodium protein, unknown function                              | N        | G248R         | 7.26E-07        |
|           | <b>2082099</b> | <b>19</b> | <b>PF3D7_1450800</b>   | <b>conserved Plasmodium protein, unknown function</b>                       | <b>N</b> | <b>S50N</b>   | <b>5.00E-08</b> |
| <b>14</b> | <b>2086413</b> | <b>18</b> | <b>PF3D7_1451000</b>   | <b>conserved Plasmodium protein, unknown function</b>                       | <b>N</b> | <b>N369K</b>  | <b>4.02E-08</b> |
|           | <b>2096133</b> | <b>12</b> | <b>PF3D7_1451200</b>   | <b>conserved Plasmodium protein, unknown function</b>                       | <b>N</b> | <b>G908R</b>  | <b>1.45E-09</b> |
|           | <b>2098642</b> | <b>7</b>  | <b>PF3D7_1451200</b>   | <b>conserved Plasmodium protein, unknown function</b>                       | <b>S</b> | <b>71N</b>    | <b>2.90E-12</b> |
|           | <b>2470644</b> | <b>6</b>  | <b>PF3D7_1460500</b>   | <b>conserved Plasmodium protein, unknown function</b>                       | <b>S</b> | <b>1518T</b>  | <b>5.50E-14</b> |
|           | <b>2481070</b> | <b>2</b>  | <b>PF3D7_1460900.1</b> | <b>apicoplast ribosomal protein S10 precursor, putative</b>                 | <b>N</b> | <b>V127M</b>  | <b>1.30E-20</b> |
|           | 2488298        | 45        | PF3D7_1461100          | conserved Plasmodium protein, unknown function                              | N        | T719R         | 7.46E-06        |
|           | 2524926        | 38        | PF3D7_1462300          | conserved Plasmodium protein, unknown function                              | N        | D1357N        | 1.76E-06        |

**Supplementary Table 3 – *Kelch13* alleles observed in the full dataset.** The table shows the number of samples carrying each of the 33 *kelch13* non-synonymous mutations (WT=wild type) in our dataset, after excluding samples for which no allele could be determined and heterozygous samples (mixtures of mutant and wild-type parasites). The columns show the *kelch* allele; sample counts for D. R. Congo, Nigeria, Bangladesh, Myanmar, Thailand, Laos, Cambodia and Vietnam; total sample count; number of samples with phenotype; and mean half-life computed from those phenotypes. Mean HL estimates based on few samples (< 5), which should be considered weakly supported, are shown in italics). Mutations in the upstream *P. falciparum*-specific portion of the gene are shaded violet, and those in the downstream BTB/POZ and propeller domains are shaded blue.

| Mutation     | Sample Count |    |    |    |     |     |     |     | Total | Phenotypes | Mean HL |
|--------------|--------------|----|----|----|-----|-----|-----|-----|-------|------------|---------|
|              | CD           | NG | BD | MM | TH  | LA  | KH  | VN  |       |            |         |
| WT           | 64           | 2  | 67 | 47 | 118 | 118 | 292 | 138 | 846   | 630        | 2.77    |
| K92N         | 1            |    |    |    |     |     |     |     | 1     | 1          | 2.40    |
| E130G        |              |    |    |    |     |     | 2   |     | 2     | 2          | 2.60    |
| T149S        | 2            |    |    |    |     |     |     |     | 2     | 2          | 1.74    |
| K189T        | 10           | 2  | 5  | 3  |     |     |     |     | 20    | 18         | 2.39    |
| E252Q        |              |    |    | 11 | 8   |     |     |     | 19    | 15         | 3.38    |
| R255K        | 2            |    |    |    |     |     |     |     | 2     | 2          | 2.12    |
| E270K        |              |    |    |    |     |     | 1   |     | 1     | 1          | 4.59    |
| D281V        |              |    |    | 2  |     |     | 1   |     | 3     | 2          | 3.33    |
| D353Y        |              |    |    |    |     |     |     | 5   | 5     | 5          | 7.70    |
| F395Y        |              |    |    |    |     |     | 1   |     | 1     | 1          | 3.78    |
| K438N        |              |    |    | 1  |     |     |     |     | 1     | 1          | 1.38    |
| P441L        |              |    |    | 5  | 6   |     |     |     | 11    | 10         | 6.34    |
| P443S        |              |    |    |    | 1   |     |     |     | 1     |            | -       |
| F446I        |              |    |    | 3  |     |     |     |     | 3     | 3          | 5.02    |
| G449A        |              |    |    | 2  | 3   |     | 2   |     | 7     | 7          | 6.55    |
| N458Y        |              |    |    |    | 6   |     |     |     | 6     | 6          | 8.38    |
| A481V        |              |    |    |    | 1   |     | 2   |     | 3     | 3          | 6.13    |
| Y493H        |              |    |    |    |     |     | 45  | 4   | 49    | 37         | 6.76    |
| N525D        |              |    |    |    | 1   |     |     |     | 1     | 1          | 4.68    |
| N537I        |              |    |    |    | 1   |     |     |     | 1     | 1          | 5.02    |
| G538V        |              |    |    |    | 8   |     |     |     | 8     | 8          | 4.42    |
| R539T        |              |    |    |    | 13  | 2   | 25  | 4   | 44    | 38         | 5.70    |
| I543T        |              |    |    |    |     |     | 2   | 22  | 24    | 23         | 7.07    |
| P553L        |              |    |    |    | 2   |     |     | 9   | 11    | 9          | 6.03    |
| R561H        |              |    |    | 2  | 5   |     |     |     | 7     | 5          | 6.93    |
| V568G        |              |    |    |    |     |     |     | 5   | 5     | 5          | 6.67    |
| P574L        |              |    |    | 6  | 1   |     |     |     | 7     | 7          | 6.85    |
| C580Y        |              |    |    | 11 | 21  |     | 241 | 9   | 282   | 246        | 6.72    |
| D584V        |              |    |    |    |     |     | 2   |     | 2     | 1          | 5.41    |
| F614L        |              |    |    |    | 1   |     |     |     | 1     | 1          | 2.50    |
| F673I        |              |    |    | 2  |     |     |     |     | 2     | 2          | 6.32    |
| A675V        |              |    |    | 2  | 11  |     |     |     | 13    | 13         | 5.60    |
| H719N        |              |    |    |    |     |     | 1   |     | 1     | 1          | 5.80    |
| <b>Total</b> | 79           | 4  | 72 | 97 | 207 | 120 | 617 | 196 | 1392  | 1107       |         |

**Supplementary Table 4 – List of single-nucleotide polymorphisms (SNPs) associated with parasite clearance half-life (PCT<sub>1/2</sub>), after correcting for presence of *kelch13* mutations.** This GWAS was performed using the same method as for the results in Supplementary Table 2, but the presence of *kelch13* mutations was corrected as a covariate. The 20 most significant associations are shown; polymorphisms that were significant in the initial GWAS are highlighted by a green background. Although several top-scoring SNPs appeared to confer strong phenotypic changes, in most cases there were too few mutant parasites to carry out detailed analyses of these loci. For each SNP, we show chromosome number; nucleotide position; gene id and description; mutation name; whether the SNP is non-synonymous or synonymous; the association *P*-value; and the residual effect of the SNP on PCT<sub>1/2</sub>, after correcting for the *kelch13* mutation effect.

| Chr | Pos     | Gene Id         | Gene Description                                                     | Mutation | N/S | <i>P</i> | Effect (h) |
|-----|---------|-----------------|----------------------------------------------------------------------|----------|-----|----------|------------|
| 8   | 392003  | PF3D7_0807600   | conserved Plasmodium protein, unknown function                       | N578D    | N   | 2E-07    | 1.46       |
| 12  | 2119411 | PF3D7_1252100   | rhoptry neck protein 3+(RON3)                                        | E691D    | N   | 1E-06    | 1.85       |
| 14  | 1685702 | PF3D7_1441300   | serine/threonine protein kinase, putative                            | 1097L    | S   | 4E-06    | 2.13       |
| 12  | 1114493 | PF3D7_1227500   | cyclin (CYC2)                                                        | 2148N    | S   | 5E-06    | 1.55       |
| 12  | 1784838 | PF3D7_1241900   | Tetratricopeptide repeat protein, putative                           | 153Q     | S   | 1E-05    | 1.40       |
| 12  | 1669294 | PF3D7_1239800   | conserved Plasmodium protein, unknown function                       | D2948E   | N   | 3E-05    | 0.98       |
| 14  | 2481070 | PF3D7_1460900.1 | apicoplast ribosomal protein S10 precursor, putative                 | V127M    | N   | 4E-05    | 0.58       |
| 14  | 2504612 | PF3D7_1461800   | conserved Plasmodium protein, unknown function                       | K155R    | N   | 5E-05    | 2.04       |
| 14  | 1956225 | PF3D7_1447900   | multidrug resistance protein 2+(heavy metal transport family) (MDR2) | T484I    | N   | 5E-05    | 0.54       |
| 14  | 2355747 | PF3D7_1457400   | conserved Plasmodium protein, unknown function                       | E1588V   | N   | 5E-05    | 0.72       |
| 12  | 1684141 | PF3D7_1240000   | 3-hydroxyisobutyryl-coenzyme A+hydrolase, putative                   | D436G    | N   | 5E-05    | 1.36       |
| 12  | 137473  | PF3D7_1202300   | dynein heavy chain, putative                                         | 4572T    | S   | 6E-05    | 0.54       |
| 12  | 1590289 | PF3D7_1238300   | cell cycle control protein, putative                                 | T374I    | N   | 7E-05    | 1.20       |
| 12  | 1759062 | PF3D7_1241300   | conserved Plasmodium protein, unknown function                       | 46C      | S   | 8E-05    | 1.26       |
| 14  | 1960049 | PF3D7_1448000   | U3 snoRNA-associated small subunit rRNA processing protein, put.     | H1271R   | N   | 8E-05    | 0.46       |
| 12  | 1424176 | PF3D7_1234100   | conserved Plasmodium protein, unknown function                       | D3255H   | N   | 8E-05    | 1.14       |
| 10  | 490720  | PF3D7_1012700   | protein phosphatase, putative                                        | V1157L   | N   | 9E-05    | 0.52       |
| 14  | 2215809 | PF3D7_1453900   | conserved Plasmodium protein, unknown function                       | 300T     | S   | 9E-05    | 0.96       |
| 6   | 116243  | PF3D7_0602800   | JmjC domain containing protein (JmjC2)                               | 54L      | S   | 9E-05    | 0.60       |
| 12  | 231311  | PF3D7_1205300   | conserved Plasmodium protein, unknown function                       | 258K     | S   | 1E-04    | 2.22       |

**Supplementary Table 5 – Subpopulations of *P. falciparum* identified in Vietnam.** The table shows the subpopulations identified in Vietnam samples: VN-C represents the “core” population, VN-F01 to VN-F04 are differentiated founder subpopulations, and VN-U comprises samples that could not be classified in one of the five other populations. The columns show the number of samples; the median and interquartile range of half-life (in hours); the number of samples for which parasite clearance half-life was used in this calculation; and the *P*-value that the distribution of phenotypes differs from that of VN-C (by two-sample Wilcoxon test).

| Population   | Sample Count | Median Half-life (IQR) | Phenotype Count | <i>P</i>            |
|--------------|--------------|------------------------|-----------------|---------------------|
| VN-C         | 76           | 2.5 (1.9-3.3)          | 64              |                     |
| VN-F01       | 21           | 7.2 (6.2-8.3)          | 20              | 9x10 <sup>-11</sup> |
| VN-F02       | 12           | 2.3 (1.8-3.2)          | 12              | 0.68                |
| VN-F03       | 9            | 2.8 (2.2-3.9)          | 8               | 0.18                |
| VN-F04       | 8            | 6.4 (4.0-7.5)          | 8               | 7x10 <sup>-5</sup>  |
| VN-U         | 79           | 4.4 (2.6-6.6)          | 72              | 10 <sup>-6</sup>    |
| <b>Total</b> | <b>205</b>   |                        | <b>184</b>      |                     |

**Supplementary Table 6 – Differentiation of SNPs between *P. falciparum* subpopulations in Vietnam.** This table shows the number of SNPs that are highly differentiated (as defined by  $F_{ST} \geq 0.5$ ) between each pair of populations. Each cell’s background colour intensity is proportional to the value therein.

|        | VN-C | VN-F01 | VN-F02 | VN-F03 | VN-F04 | VN-U |
|--------|------|--------|--------|--------|--------|------|
| VN-C   | -    | 1673   | 253    | 718    | 754    | 0    |
| VN-F01 | 1673 | -      | 2298   | 3093   | 3259   | 1479 |
| VN-F02 | 253  | 2298   | -      | 1804   | 1909   | 216  |
| VN-F03 | 718  | 3093   | 1804   | -      | 2651   | 717  |
| VN-F04 | 754  | 3259   | 1909   | 2651   | -      | 682  |
| VN-U   | 0    | 1479   | 216    | 717    | 682    | -    |

**Supplementary Table 7 – Subpopulations of *P. falciparum* identified in Cambodia.** The table shows the subpopulations identified in Cambodia samples: KH-C represents the “core” population, WKH-F01 to WKH-F04 are differentiated founder subpopulations in west Cambodia, NKH-F01 to NKH-F03 are differentiated founder subpopulations in north Cambodia, and VN-U comprises samples that could not be classified in one of the eight other populations. For each subpopulation, the columns show the number of samples stratified by region (NEKH=northeast, NKH=north, and WKH=west) and their total; the median and interquartile range of half-life (in hours); the number of samples for which parasite clearance half-life was used in this calculation; and the *P*-value that the distribution of phenotypes differs from that of KH-C (by two-sample Wilcoxon test).

| Population   | Sample Count |           |            |            | Median Half-life (IQR) | Phenotype Count | <i>P</i>            |
|--------------|--------------|-----------|------------|------------|------------------------|-----------------|---------------------|
|              | NEKH         | NKH       | WKH        | Total      |                        |                 |                     |
| KH-C         | 120          | 1         | 3          | 124        | 3.0 (2.4-3.5)          | 119             |                     |
| WKH-F01      |              |           | 54         | 54         | 6.2 (5.2-7.2)          | 47              | $2 \times 10^{-21}$ |
| WKH-F02      |              | 2         | 14         | 16         | 6.0 (5.0-6.4)          | 15              | $4 \times 10^{-9}$  |
| WKH-F03      |              |           | 34         | 34         | 7.0 (5.8-7.9)          | 33              | $1 \times 10^{-17}$ |
| WKH-F04      |              |           | 15         | 15         | 6.4 (5.5-7.1)          | 13              | $7 \times 10^{-9}$  |
| NKH-F01      |              | 14        |            | 14         | 3.2 (2.3-3.7)          | 14              | 0.25                |
| NKH-F02      |              | 9         |            | 9          | 5.5 (5.3-8.4)          | 9               | $10^{-5}$           |
| NKH-F03      |              | 11        |            | 11         | 3.0 (2.8-3.9)          | 11              | 0.08                |
| KH-U         | 11           | 48        | 179        | 238        | 5.3 (3.4-7.0)          | 206             | $10^{-21}$          |
| <b>Total</b> | <b>131</b>   | <b>85</b> | <b>299</b> | <b>515</b> |                        | <b>467</b>      |                     |

**Supplementary Table 8 – Differentiation of SNPs between *P. falciparum* subpopulations in Cambodia.** The table shows the number of SNPs that are highly differentiated (as defined by  $F_{ST} \geq 0.5$ ) between each pair of populations. Each cell’s background colour intensity is proportional to the value therein.

|         | KH-C | WKH-F01 | WKH-F02 | WKH-F03 | WKH-F04 | NKH-F01 | NKH-F02 | NKH-F03 | KH-U |
|---------|------|---------|---------|---------|---------|---------|---------|---------|------|
| KH-C    | -    | 1431    | 1412    | 1192    | 654     | 492     | 1438    | 1276    | 4    |
| WKH-F01 | 1431 | -       | 3098    | 1490    | 2113    | 2428    | 3038    | 3329    | 644  |
| WKH-F02 | 1412 | 3098    | -       | 2568    | 2174    | 2385    | 2997    | 3239    | 947  |
| WKH-F03 | 1192 | 1490    | 2568    | -       | 1772    | 2073    | 2516    | 2698    | 631  |
| WKH-F04 | 654  | 2113    | 2174    | 1772    | -       | 1596    | 2145    | 2364    | 464  |
| NKH-F01 | 492  | 2428    | 2385    | 2073    | 1596    | -       | 2461    | 2592    | 498  |
| NKH-F02 | 1438 | 3038    | 2997    | 2516    | 2145    | 2461    | -       | 3270    | 1172 |
| NKH-F03 | 1276 | 3329    | 3239    | 2698    | 2364    | 2592    | 3270    | -       | 1202 |
| KH-U    | 4    | 644     | 947     | 631     | 464     | 498     | 1172    | 1202    | -    |

**Supplementary Table 9 – List of SNPs that are most highly differentiated between founder and core populations in Vietnam and Cambodia.** Each SNP is scored by the mean  $F_{ST}$  between artemisinin resistant founder populations and their respective core populations. The top 50 results are listed here. SNPs that scored highly in the genome-wide association study ( $P \leq 10^{-5}$ , Supplementary Table 2) have a coloured background. For each SNP, we show chromosome number; nucleotide position; the containing locus, as identified in Table 1; id and description of the containing gene; whether the SNP is non-synonymous or synonymous; mutation name; non-reference allele frequency (NRAF) in each population; and the score. Headers are shaded pink for artemisinin resistant populations, and blue for sensitive populations.

| Chr | Pos     | Locus         | Gene Id         | Gene Description                                            | N/S | Mutation | VN-C |      | VN-F01 |        |         |         |         |         |         |        | VN-F02 |         |         |      | VN-U | KH-U | Score |
|-----|---------|---------------|-----------------|-------------------------------------------------------------|-----|----------|------|------|--------|--------|---------|---------|---------|---------|---------|--------|--------|---------|---------|------|------|------|-------|
|     |         |               |                 |                                                             |     |          | VN-C | KH-C | VN-F01 | VN-F04 | WKH-F01 | WKH-F02 | WKH-F03 | WKH-F04 | NKH-F02 | VN-F02 | VN-F03 | NKH-F01 | NKH-F03 |      |      |      |       |
| 13  | 748395  | <i>fd</i>     | PF3D7_1318100   | ferredoxin, putative                                        | N   | D193Y    | 0.06 | 0.02 | 1.00   | 0.82   | 0.98    | 1.00    | 1.00    | 1.00    | 0.98    | 0.28   | 0.00   | 0.03    | 0.01    | 0.51 | 0.80 | 0.89 |       |
| 13  | 754133  | <i>fd</i>     | PF3D7_1318300   | conserved Pf protein, unknown function                      | N   | T75I     | 0.09 | 0.03 | 1.00   | 0.86   | 0.96    | 1.00    | 1.00    | 1.00    | 0.98    | 0.28   | 0.00   | 0.02    | 0.00    | 0.57 | 0.82 | 0.85 |       |
| 7   | 405600  | <i>crt</i>    | PF3D7_0709000   | chloroquine resistance transporter (CRT)                    | N   | I356T    | 0.15 | 0.05 | 1.00   | 0.00   | 1.00    | 1.00    | 1.00    | 1.00    | 0.98    | 0.33   | 0.96   | 0.02    | 0.04    | 0.32 | 0.81 | 0.75 |       |
| 7   | 405362  | <i>crt</i>    | PF3D7_0709000   | chloroquine resistance transporter (CRT)                    | N   | N326S    | 0.14 | 0.06 | 1.00   | 0.00   | 1.00    | 1.00    | 1.00    | 1.00    | 0.98    | 0.31   | 0.94   | 0.04    | 0.01    | 0.31 | 0.81 | 0.75 |       |
| 10  | 497461  | <i>pph</i>    | PF3D7_1012900   | conserved Pf protein, unknown function                      | N   | T38I     | 0.29 | 0.08 | 1.00   | 0.92   | 1.00    | 1.00    | 1.00    | 1.00    | 0.97    | 0.49   | 0.52   | 1.00    | 0.06    | 0.66 | 0.77 | 0.74 |       |
| 5   | 852479  |               | PF3D7_0520800   | conserved Pf protein, unknown function                      | N   | S1183N   | 0.05 | 0.03 | 0.00   | 0.90   | 0.96    | 0.88    | 1.00    | 1.00    | 0.97    | 0.19   | 0.01   | 0.01    | 0.00    | 0.35 | 0.59 | 0.73 |       |
| 14  | 2481070 | <i>arps10</i> | PF3D7_1460900.1 | apicoplast ribosomal protein S10 precursor, putative        | N   | V127M    | 0.13 | 0.08 | 1.00   | 0.07   | 1.00    | 1.00    | 1.00    | 1.00    | 0.98    | 0.10   | 0.00   | 0.02    | 0.97    | 0.55 | 0.77 | 0.71 |       |
| 14  | 1481954 |               | PF3D7_1436300   | translocon component PTEX150 (PTEX150)                      | S   | 726Q     | 0.08 | 0.10 | 1.00   | 0.92   | 1.00    | 0.99    | 1.00    | 0.33    | 0.97    | 0.01   | 0.06   | 0.02    | 0.04    | 0.28 | 0.64 | 0.70 |       |
| 10  | 490720  | <i>pph</i>    | PF3D7_1012700   | protein phosphatase, putative                               | N   | V1157L   | 0.31 | 0.09 | 1.00   | 0.92   | 1.00    | 1.00    | 1.00    | 0.80    | 0.99    | 0.48   | 0.51   | 1.00    | 0.07    | 0.56 | 0.64 | 0.68 |       |
| 10  | 490648  | <i>pph</i>    | PF3D7_1012700   | protein phosphatase, putative                               | N   | Y1133N   | 0.31 | 0.08 | 1.00   | 0.94   | 1.00    | 1.00    | 1.00    | 0.80    | 0.97    | 0.56   | 0.50   | 1.00    | 0.07    | 0.59 | 0.65 | 0.68 |       |
| 5   | 958440  |               | PF3D7_0523000   | multidrug resistance protein (MDR1)                         | N   | Y184F    | 0.11 | 0.02 | 0.00   | 0.89   | 1.00    | 1.00    | 1.00    | 0.53    | 0.98    | 0.19   | 0.22   | 0.02    | 0.91    | 0.33 | 0.61 | 0.68 |       |
| 12  | 895047  |               | PF3D7_1222400   | transcription factor with AP2 domain(s) (ApiAP2)            | N   | Q1489H   | 0.14 | 0.04 | 0.00   | 0.15   | 1.00    | 1.00    | 1.00    | 1.00    | 1.00    | 0.80   | 0.00   | 0.02    | 0.95    | 0.34 | 0.60 | 0.67 |       |
| 5   | 937428  |               | PF3D7_0522500   | mitochondrial ribosomal protein L17 precursor, putative     | S   | 66L      | 0.10 | 0.02 | 0.00   | 0.86   | 0.96    | 1.00    | 1.00    | 0.53    | 0.98    | 0.19   | 0.00   | 0.02    | 0.92    | 0.30 | 0.68 | 0.67 |       |
| 12  | 722310  |               | PF3D7_1218400   | triose or hexose phosphate/phosphate translocator, putative | N   | R294C    | 0.10 | 0.02 | 1.00   | 0.00   | 1.00    | 0.01    | 1.00    | 1.00    | 0.97    | 0.14   | 0.00   | 0.00    | 0.01    | 0.31 | 0.52 | 0.66 |       |
| 12  | 895415  |               | PF3D7_1222400   | transcription factor with AP2 domain(s) (ApiAP2)            | N   | E1612V   | 0.85 | 0.87 | 0.00   | 0.82   | 0.00    | 0.00    | 0.00    | 0.00    | 0.00    | 0.18   | 0.17   | 0.97    | 0.04    | 0.59 | 0.38 | 0.66 |       |
| 5   | 923033  |               | PF3D7_0522400   | conserved Pf protein, unknown function                      | N   | S4938A   | 0.06 | 0.05 | 0.00   | 0.93   | 1.00    | 1.00    | 1.00    | 0.53    | 0.98    | 0.18   | 0.00   | 0.02    | 0.88    | 0.25 | 0.67 | 0.66 |       |
| 13  | 2373333 | <i>kelch</i>  | PF3D7_1359600   | conserved Pf protein, unknown function                      | N   | L484F    | 0.08 | 0.14 | 1.00   | 0.26   | 0.98    | 1.00    | 1.00    | 1.00    | 0.97    | 0.27   | 0.00   | 0.02    | 0.00    | 0.37 | 0.63 | 0.65 |       |
| 1   | 340448  |               | PF3D7_0108300   | conserved Pf protein, unknown function                      | N   | S1094N   | 0.17 | 0.08 | 1.00   | 0.91   | 0.94    | 0.13    | 1.00    | 1.00    | 0.98    | 0.34   | 0.01   | 0.20    | 0.02    | 0.40 | 0.57 | 0.65 |       |
| 12  | 1010085 |               | PF3D7_1224800   | conserved Pf protein, unknown function                      | N   | N266I    | 0.15 | 0.04 | 0.00   | 0.16   | 1.00    | 0.94    | 1.00    | 1.00    | 0.97    | 0.71   | 0.81   | 0.03    | 0.04    | 0.19 | 0.59 | 0.64 |       |
| 13  | 2373848 | <i>kelch</i>  | PF3D7_1359600   | conserved Pf protein, unknown function                      | N   | D656G    | 0.15 | 0.14 | 1.00   | 0.23   | 1.00    | 1.00    | 1.00    | 1.00    | 0.97    | 0.27   | 0.00   | 0.03    | 0.00    | 0.44 | 0.70 | 0.64 |       |

|    |         |                             |                                                                       |   |        |      |      |      |      |      |      |      |      |      |      |      |      |      |      |      |      |
|----|---------|-----------------------------|-----------------------------------------------------------------------|---|--------|------|------|------|------|------|------|------|------|------|------|------|------|------|------|------|------|
| 8  | 786758  | PF3D7_0817300               | asparagine-rich antigen                                               | S | 953N   | 0.11 | 0.05 | 1.00 | 0.50 | 0.90 | 1.00 | 0.98 | 1.00 | 0.00 | 0.01 | 0.72 | 0.00 | 0.00 | 0.30 | 0.39 | 0.63 |
| 12 | 892564  | PF3D7_1222400               | transcription factor with AP2 domain(s) (ApiAP2)                      | N | H662N  | 0.19 | 0.15 | 1.00 | 0.14 | 1.00 | 0.99 | 1.00 | 1.00 | 1.00 | 0.80 | 0.84 | 0.03 | 0.98 | 0.38 | 0.63 | 0.63 |
| 14 | 1481740 | PF3D7_1436300               | translocon component PTEX150 (PTEX150)                                | N | D655A  | 0.16 | 0.12 | 1.00 | 0.88 | 1.00 | 1.00 | 1.00 | 0.33 | 0.97 | 0.67 | 0.06 | 0.37 | 0.08 | 0.38 | 0.81 | 0.63 |
| 2  | 524756  | PF3D7_0212700               | conserved P. protein, unknown function                                | N | I430V  | 0.01 | 0.05 | 1.00 | 0.05 | 0.98 | 0.99 | 0.97 | 0.00 | 0.92 | 0.39 | 0.00 | 0.03 | 0.06 | 0.24 | 0.37 | 0.62 |
| 9  | 1022363 | PF3D7_0925400               | protein phosphatase-beta                                              | N | T299M  | 0.03 | 0.07 | 1.00 | 0.23 | 0.95 | 1.00 | 1.00 | 0.00 | 0.98 | 0.70 | 0.00 | 0.79 | 0.05 | 0.33 | 0.41 | 0.62 |
| 8  | 511014  | PF3D7_0809900               | JmjC domain containing protein (JmjC1)                                | N | S472L  | 0.26 | 0.14 | 1.00 | 0.94 | 0.91 | 0.94 | 1.00 | 1.00 | 0.89 | 0.02 | 0.24 | 0.71 | 0.00 | 0.31 | 0.60 | 0.62 |
| 12 | 892467  | PF3D7_1222400               | transcription factor with AP2 domain(s) (ApiAP2)                      | S | 629K   | 0.18 | 0.15 | 1.00 | 0.15 | 1.00 | 1.00 | 0.99 | 1.00 | 1.00 | 0.79 | 0.82 | 0.03 | 0.97 | 0.38 | 0.63 | 0.62 |
| 14 | 2528725 | <i>arps10</i> PF3D7_1462300 | conserved Pf protein, unknown function                                | S | 90V    | 0.17 | 0.04 | 1.00 | 0.13 | 1.00 | 0.13 | 1.00 | 1.00 | 0.98 | 0.09 | 0.00 | 0.03 | 0.98 | 0.48 | 0.65 | 0.62 |
| 13 | 1862741 | <i>kelch</i> PF3D7_1346400  | conserved Pf protein, unknown function                                | N | D3282H | 0.12 | 0.07 | 0.00 | 0.00 | 0.94 | 1.00 | 1.00 | 1.00 | 0.97 | 0.08 | 0.01 | 0.86 | 0.02 | 0.25 | 0.62 | 0.62 |
| 5  | 855646  | PF3D7_0520800               | conserved Pf protein, unknown function                                | S | 127N   | 0.10 | 0.03 | 0.00 | 0.92 | 0.91 | 0.87 | 1.00 | 0.47 | 0.98 | 0.18 | 0.01 | 0.00 | 0.00 | 0.27 | 0.52 | 0.62 |
| 5  | 924826  | PF3D7_0522400               | conserved Pf protein, unknown function                                | N | H5535Q | 0.12 | 0.08 | 0.00 | 0.91 | 1.00 | 1.00 | 1.00 | 0.53 | 0.99 | 0.19 | 0.00 | 0.01 | 0.90 | 0.28 | 0.67 | 0.61 |
| 14 | 2525648 | <i>arps10</i> PF3D7_1462300 | conserved Pf protein, unknown function                                | N | Y1116F | 0.14 | 0.07 | 0.99 | 0.07 | 1.00 | 0.13 | 0.99 | 1.00 | 1.00 | 0.11 | 0.00 | 0.02 | 0.97 | 0.45 | 0.58 | 0.61 |
| 5  | 966809  | PF3D7_0523200               | conserved Pf protein, unknown function                                | N | N229K  | 0.21 | 0.06 | 1.00 | 0.91 | 0.98 | 1.00 | 0.53 | 0.53 | 0.98 | 0.39 | 0.75 | 0.01 | 0.05 | 0.24 | 0.41 | 0.61 |
| 14 | 2081506 | 14-02 PF3D7_1450800         | conserved Pf protein, unknown function                                | N | G248R  | 0.09 | 0.14 | 1.00 | 0.00 | 1.00 | 0.87 | 1.00 | 0.88 | 1.00 | 0.01 | 0.00 | 0.38 | 0.94 | 0.18 | 0.61 | 0.61 |
| 14 | 2082099 | 14-02 PF3D7_1450800         | conserved Pf protein, unknown function                                | N | S50N   | 0.08 | 0.13 | 1.00 | 0.00 | 1.00 | 0.80 | 1.00 | 0.88 | 1.00 | 0.01 | 0.00 | 0.37 | 0.93 | 0.13 | 0.61 | 0.60 |
| 10 | 885314  | PF3D7_1021700               | conserved Pf protein, unknown function                                | N | N3000D | 0.19 | 0.09 | 1.00 | 0.11 | 0.96 | 1.00 | 1.00 | 0.60 | 0.98 | 0.06 | 0.76 | 0.02 | 0.01 | 0.40 | 0.62 | 0.60 |
| 8  | 789468  | PF3D7_0817300               | asparagine-rich antigen                                               | N | K50R   | 0.28 | 0.18 | 1.00 | 0.83 | 0.94 | 1.00 | 1.00 | 1.00 | 0.98 | 0.78 | 0.76 | 0.01 | 0.00 | 0.60 | 0.67 | 0.60 |
| 10 | 331476  | PF3D7_1008100               | conserved Pf protein, unknown function                                | N | F77L   | 0.85 | 0.83 | 0.00 | 0.07 | 0.00 | 0.06 | 0.00 | 1.00 | 0.00 | 0.44 | 1.00 | 0.29 | 0.04 | 0.68 | 0.40 | 0.60 |
| 11 | 796730  | PF3D7_1121100               | conserved Pf protein, unknown function                                | N | N777I  | 0.16 | 0.06 | 1.00 | 0.03 | 0.98 | 0.99 | 1.00 | 0.07 | 0.95 | 0.29 | 0.98 | 0.02 | 0.00 | 0.29 | 0.49 | 0.59 |
| 14 | 1990395 | <i>mdr2</i> PF3D7_1448500   | chloroquine resistance marker prot. (CRMP)                            | N | D1727V | 0.30 | 0.14 | 1.00 | 0.00 | 0.99 | 1.00 | 1.00 | 0.80 | 0.98 | 0.26 | 0.00 | 0.17 | 0.96 | 0.28 | 0.62 | 0.59 |
| 12 | 1054566 | PF3D7_1226000               | conserved Pf protein, unknown function                                | N | H573N  | 0.08 | 0.03 | 0.00 | 0.77 | 1.00 | 0.93 | 0.99 | 1.00 | 0.00 | 0.06 | 0.17 | 0.02 | 0.91 | 0.20 | 0.41 | 0.59 |
| 8  | 399899  | PF3D7_0807800               | proteasome subunit alpha type 5, putative                             | N | E380.  | 0.16 | 0.09 | 1.00 | 0.68 | 0.95 | 0.93 | 0.99 | 1.00 | 0.00 | 0.02 | 0.00 | 1.00 | 0.02 | 0.33 | 0.58 | 0.59 |
| 8  | 399898  | PF3D7_0807800               | proteasome subunit alpha type 5, putative                             | N | E380V  | 0.16 | 0.09 | 1.00 | 0.68 | 0.95 | 0.93 | 0.99 | 1.00 | 0.00 | 0.02 | 0.00 | 1.00 | 0.02 | 0.33 | 0.59 | 0.59 |
| 13 | 1867630 | <i>kelch</i> PF3D7_1346400  | conserved Pf protein, unknown function                                | N | M4911I | 0.86 | 0.90 | 1.00 | 1.00 | 0.06 | 0.00 | 0.00 | 0.00 | 0.00 | 1.00 | 0.99 | 0.47 | 0.97 | 0.76 | 0.39 | 0.59 |
| 5  | 806315  | PF3D7_0519500               | carbon catabolite repressor protein 4, putative (CCR4)                | N | I938T  | 0.03 | 0.02 | 0.00 | 0.73 | 0.89 | 0.00 | 1.00 | 1.00 | 0.97 | 0.00 | 0.24 | 0.02 | 0.00 | 0.22 | 0.36 | 0.59 |
| 8  | 491465  | PF3D7_0809600               | peptidase family C50, putative                                        | N | C1973Y | 0.11 | 0.02 | 0.00 | 0.91 | 0.91 | 0.80 | 1.00 | 1.00 | 0.00 | 0.00 | 0.00 | 0.67 | 0.00 | 0.20 | 0.47 | 0.58 |
| 14 | 1956225 | <i>mdr2</i> PF3D7_1447900   | multidrug resistance protein 2+ (heavy metal transport family) (MDR2) | N | T484I  | 0.28 | 0.22 | 1.00 | 0.89 | 1.00 | 1.00 | 1.00 | 1.00 | 0.97 | 0.64 | 0.00 | 0.16 | 0.96 | 0.52 | 0.70 | 0.58 |
| 8  | 399774  | PF3D7_0807800               | proteasome subunit alpha type 5, putative                             | S | 421K   | 0.17 | 0.11 | 1.00 | 0.74 | 0.95 | 0.92 | 1.00 | 1.00 | 0.00 | 0.29 | 0.00 | 1.00 | 0.01 | 0.33 | 0.57 | 0.58 |
| 1  | 487131  | PF3D7_0112900               | Pf exported protein, unknown function                                 | N | I171T  | 0.22 | 0.09 | 1.00 | 0.00 | 0.97 | 1.00 | 1.00 | 0.00 | 0.96 | 0.48 | 0.00 | 0.04 | 0.00 | 0.19 | 0.35 | 0.58 |
| 9  | 749285  | PF3D7_0918200               | organelle ribosomal protein L3 prec, putative                         | S | 199R   | 0.19 | 0.11 | 1.00 | 0.00 | 1.00 | 1.00 | 1.00 | 1.00 | 0.00 | 0.01 | 0.05 | 0.04 | 0.90 | 0.12 | 0.48 | 0.58 |

**Supplementary Table 10 – List of genes with one or more SNPs that are highly differentiated between founder and core populations in Vietnam and Cambodia.** This analysis is similar to the analysis that produced results in Supplementary Table 9, but here we adopt a heteroallelic model, i.e. we test a gene rather than a SNP, considering a mutant to be a sample in which any SNP in the gene has mutated. Only SNPs with  $F_{ST} \geq 0.3$  between at least one founder and its respective core population are considered in this analysis. The score is the mean of the  $F_{ST}$  values for the seven artemisinin resistant founder populations. Here we show the 20 highest-scoring genes, sorted by descending score. For each gene, we show its id and description; score; number of SNPs in the gene; and  $F_{ST}$  for each of the artemisinin resistant founder populations. Further analysis has shown that scores tend to increase with SNP count, such that results are most significant for genes with lower SNP counts (Supplementary Figure 6).

| Id                   | Description                                            | Score        | SNP Count | WKH-F01     | WKH-F02     | WKH-F03     | WKH-F04     | NKH-F02     | VN-F04      | VN-F02      |
|----------------------|--------------------------------------------------------|--------------|-----------|-------------|-------------|-------------|-------------|-------------|-------------|-------------|
| <b>PF3D7_1343700</b> | <b>kelch protein, putative</b>                         | <b>0.900</b> | <b>5</b>  | <b>0.92</b> | <b>1.00</b> | <b>0.99</b> | <b>1.00</b> | <b>0.95</b> | <b>1.00</b> | <b>0.45</b> |
| PF3D7_1038400        | gametocyte-specific protein (Pf11-1)                   | 0.887        | 17        | 0.87        | 0.75        | 0.86        | 0.88        | 0.92        | 1.00        | 0.93        |
| <b>PF3D7_1318100</b> | <b>ferredoxin, putative</b>                            | <b>0.886</b> | <b>1</b>  | <b>0.92</b> | <b>0.95</b> | <b>0.95</b> | <b>0.96</b> | <b>0.92</b> | <b>0.90</b> | <b>0.60</b> |
| PF3D7_0826100        | E3 ubiquitin-protein ligase, putative                  | 0.881        | 20        | 0.81        | 0.99        | 0.92        | 0.96        | 0.96        | 0.97        | 0.54        |
| <b>PF3D7_1318300</b> | <b>conserved Plasmodium protein, unknown function</b>  | <b>0.880</b> | <b>8</b>  | <b>0.89</b> | <b>0.93</b> | <b>0.98</b> | <b>1.00</b> | <b>0.95</b> | <b>0.82</b> | <b>0.59</b> |
| PF3D7_1303800        | conserved Plasmodium protein, unknown function         | 0.861        | 28        | 0.86        | 0.94        | 0.98        | 0.90        | 0.85        | 1.00        | 0.49        |
| <b>PF3D7_1346400</b> | <b>conserved Plasmodium protein, unknown function</b>  | <b>0.837</b> | <b>7</b>  | <b>0.88</b> | <b>0.98</b> | <b>0.87</b> | <b>0.99</b> | <b>0.95</b> | <b>0.69</b> | <b>0.49</b> |
| PF3D7_0519500        | carbon catabolite repressor protein 4, putative (CCR4) | 0.824        | 7         | 0.88        | 0.48        | 0.96        | 0.96        | 0.92        | 0.96        | 0.60        |
| <b>PF3D7_0701900</b> | <b>Plasmodium exported protein, unknown function</b>   | <b>0.822</b> | <b>48</b> | <b>0.62</b> | <b>0.74</b> | <b>0.87</b> | <b>1.00</b> | <b>0.75</b> | <b>1.00</b> | <b>0.77</b> |
| PF3D7_0926100        | protein kinase, putative                               | 0.815        | 8         | 0.96        | 0.91        | 0.91        | 0.81        | 0.90        | 0.64        | 0.57        |
| PF3D7_1433400        | conserved P. membrane protein, unknown function        | 0.808        | 9         | 0.80        | 0.85        | 0.97        | 0.36        | 0.99        | 0.92        | 0.76        |
| PF3D7_1211200        | conserved Plasmodium protein, unknown function         | 0.807        | 9         | 0.87        | 0.92        | 0.98        | 0.22        | 0.93        | 0.95        | 0.78        |
| <b>PF3D7_0809600</b> | <b>peptidase family C50, putative</b>                  | <b>0.802</b> | <b>24</b> | <b>0.80</b> | <b>0.64</b> | <b>0.96</b> | <b>0.97</b> | <b>0.67</b> | <b>0.90</b> | <b>0.68</b> |
| PF3D7_0113800        | DBL containing protein, unknown function               | 0.795        | 79        | 0.95        | 0.78        | 0.98        | 0.76        | 0.62        | 0.82        | 0.65        |
| PF3D7_0903400        | DEAD/DEAH box helicase, putative                       | 0.793        | 23        | 0.91        | 0.76        | 0.72        | 0.75        | 0.80        | 0.77        | 0.84        |
| PF3D7_1418100        | liver specific protein 1, putative (LISP1)             | 0.792        | 6         | 0.84        | 0.93        | 0.99        | 0.30        | 0.81        | 0.98        | 0.69        |
| PF3D7_0713900        | conserved Plasmodium protein, unknown function         | 0.791        | 33        | 0.73        | 1.00        | 0.98        | 0.41        | 0.79        | 0.97        | 0.66        |
| PF3D7_0914000        | pseudouridylate synthase, putative                     | 0.788        | 7         | 0.89        | 0.82        | 0.96        | 0.73        | 0.68        | 0.76        | 0.68        |
| PF3D7_1444100        | conserved Plasmodium protein, unknown function         | 0.785        | 23        | 0.99        | 0.55        | 0.99        | 0.43        | 0.91        | 0.81        | 0.82        |
| PF3D7_0207300        | serine repeat antigen 8+(SERA8)                        | 0.785        | 8         | 0.77        | 0.95        | 0.76        | 0.94        | 0.74        | 0.98        | 0.37        |



**Supplementary Table 11 – Presence of *kelch13* alleles in founder and core populations in Vietnam and Cambodia.** The table shows the counts of samples carrying each *kelch13* allele (WT = wild type) observed in artemisinin resistant founder and core populations. While the C580Y mutation is practically fixed in three Cambodia founders, it is absent from Vietnam founders and from two Western Cambodia founders. Nearly all parasites in the core populations carry the wild-type *kelch13* allele. Samples classified as “*Het*” carried a mixture of parasites, including mutants.

| Population   | WT         | Y493H     | R539T     | I543T     | P553L    | C580Y     | <i>Het</i> | Total      |
|--------------|------------|-----------|-----------|-----------|----------|-----------|------------|------------|
| VN-C         | 69         | 1         |           |           | 2        |           | 4          | 76         |
| KH-C         | 122        |           |           |           |          |           | 2          | 124        |
| VN-F01       |            |           |           | 20        |          |           | 1          | 21         |
| VN-F04       | 1          |           |           |           | 4        |           | 3          | 8          |
| WKH-F01      | 2          |           |           |           |          | 49        | 3          | 54         |
| WKH-F02      | 1          |           | 15        |           |          |           |            | 16         |
| WKH-F03      |            |           |           |           |          | 32        | 2          | 34         |
| WKH-F04      |            | 15        |           |           |          |           |            | 15         |
| NKH-F02      |            |           |           |           |          | 8         | 1          | 9          |
| <b>Total</b> | <b>195</b> | <b>16</b> | <b>15</b> | <b>20</b> | <b>6</b> | <b>89</b> | <b>16</b>  | <b>357</b> |

**Supplementary Table 12 – Frequencies of *kelch13* mutants at the 15 Asian sites surveyed.** This table shows the proportion of parasites sampled at each location that carried a *kelch13* resistance mutation. The sites are divided into compartments (BD, WSEA and ESEA) following population structure (Figure 3), and ESEA sites are further divided into high (ESEA-HR), variable (ESEA-VR) and low (ESEA-LR) resistance regions, according to the level of resistance mutations observed.

| Compartment    | Country (Region)     | Location     | Mutant Frequency |      |
|----------------|----------------------|--------------|------------------|------|
| <b>BD</b>      | Bangladesh           | Bandarban    | 0.0%             |      |
|                |                      | Ramu         | 0.0%             |      |
| <b>WSEA</b>    | Myanmar (Central)    | Bago         | 21.8%            |      |
|                | Thailand (West)      | Mae Sot      | 29.2%            |      |
|                | Myanmar (South)      | Kawthaung    | 47.8%            |      |
|                | Thailand (South)     | Ranong       | 66.7%            |      |
|                | Thailand (East)      | Sisakhet     | 94.4%            |      |
| <b>ESEA-HR</b> | Cambodia (West)      | Pailin       | 91.2%            |      |
|                |                      | Tasanh       | 79.2%            |      |
|                |                      | Pursat       | 70.9%            |      |
| <b>ESEA-VR</b> | Vietnam              | Binh Phuoc   | 29.4%            |      |
|                | Cambodia (North)     | Preah Vihear | 20.6%            |      |
| <b>ESEA-LR</b> | Cambodia (Northeast) | Ratanakiri   | 2.1%             |      |
|                |                      | Laos         | Attapeu          | 2.4% |
|                |                      | Xepon        | 0.0%             |      |

**Supplementary Table 13 – Highly differentiated SNPs between population compartments.** Estimates of  $F_{ST}$  were obtained for two pairs of compartments: Bangladesh (BD) vs. WSEA, and high-resistance (HR) vs. low-resistance (LR) in ESEA. SNPs were subsequently assigned a score equal to the mean of the two estimated. The top 10 results are shown in this table, ordered by descending mean  $F_{ST}$ . For each SNP, we show chromosome number; nucleotide position; gene id and description; whether the SNP is non-synonymous or synonymous; mutation name;  $F_{ST}$  estimates for the two pairs of compartments, and their mean.

| Chr | Pos     | Gene Id         | Gene Description                                                     | N/S | Mutation | $F_{ST}$ |       |      |
|-----|---------|-----------------|----------------------------------------------------------------------|-----|----------|----------|-------|------|
|     |         |                 |                                                                      |     |          | WSEA-BD  | HR-LR | Mean |
| 13  | 748395  | PF3D7_1318100   | ferredoxin, putative                                                 | N   | D193Y    | 0.64     | 0.85  | 0.75 |
| 13  | 754133  | PF3D7_1318300   | conserved Plasmodium protein, unknown function                       | N   | T75I     | 0.46     | 0.81  | 0.63 |
| 7   | 405362  | PF3D7_0709000   | chloroquine resistance transporter (CRT)                             | N   | N326S    | 0.53     | 0.71  | 0.62 |
| 14  | 2481070 | PF3D7_1460900.1 | apicoplast ribosomal protein S10 precursor, putative                 | N   | V127M    | 0.44     | 0.64  | 0.54 |
| 14  | 1956225 | PF3D7_1447900   | multidrug resistance protein 2+(heavy metal transport family) (MDR2) | N   | T484I    | 0.53     | 0.44  | 0.48 |
| 12  | 1010085 | PF3D7_1224800   | conserved Plasmodium protein, unknown function                       | N   | N266I    | 0.31     | 0.54  | 0.42 |
| 14  | 2096133 | PF3D7_1451200   | conserved Plasmodium protein, unknown function                       | N   | G908R    | 0.43     | 0.39  | 0.41 |
| 14  | 1481740 | PF3D7_1436300   | translocon component PTEX150 (PTEX150)                               | N   | D655A    | 0.30     | 0.51  | 0.41 |
| 10  | 497461  | PF3D7_1012900   | conserved Plasmodium protein, unknown function                       | N   | T38I     | 0.15     | 0.64  | 0.39 |
| 7   | 405600  | PF3D7_0709000   | chloroquine resistance transporter (CRT)                             | N   | I356T    | 0.08     | 0.70  | 0.39 |

**Supplementary Table 14 – Frequency of artemisinin resistance mutations in different population compartments.** This table uses the same site grouping as in Supplementary Table 12.

| Mutation            | BD  | WSEA | ESEA |     |     |
|---------------------|-----|------|------|-----|-----|
|                     |     |      | HR   | IR  | LR  |
| <i>kelch13</i>      | 0%  | 33%  | 79%  | 27% | 2%  |
| <i>arps10</i> V127M | 0%  | 61%  | 92%  | 42% | 12% |
| <i>fd</i> D193Y     | 2%  | 81%  | 95%  | 35% | 3%  |
| <i>mdr2</i> T484I   | 6%  | 78%  | 88%  | 46% | 23% |
| <i>crt</i> N326S    | 31% | 100% | 94%  | 38% | 10% |

**Supplementary Table 15 – Distribution of *kelch13* alleles in the two major Southeast Asian compartments.** The table shows, for each *kelch13* resistance mutation observed in our dataset, the number of samples in which the mutant allele is observed, and the number of sites where these samples were found. The alleles are organized in three groups: alleles found only in WSEA, alleles found in both compartments, and alleles found only in ESEA; within each group, alleles are ordered by amino acid position. Only four of 25 alleles were found in both compartments; of these, only C580Y was observed in more than two samples in each compartment.

| Allele       | WSEA (4 sites) |       | ESEA (9 sites) |       |
|--------------|----------------|-------|----------------|-------|
|              | Samples        | Sites | Samples        | Sites |
| K438N        | 1              | 1     |                |       |
| P441L        | 11             | 4     |                |       |
| P443S        | 1              | 1     |                |       |
| F446I        | 3              | 1     |                |       |
| N458Y        | 6              | 1     |                |       |
| N525D        | 1              | 1     |                |       |
| N537I        | 1              | 1     |                |       |
| G538V        | 8              | 1     |                |       |
| R561H        | 7              | 2     |                |       |
| P574L        | 7              | 3     |                |       |
| F614L        | 1              | 1     |                |       |
| F673I        | 2              | 1     |                |       |
| A675V        | 13             | 2     |                |       |
| G449A        | 5              | 2     | 2              | 1     |
| A481V        | 1              | 1     | 2              | 1     |
| P553L        | 2              | 1     | 9              | 1     |
| C580Y        | 28             | 3     | 254            | 7     |
| D353Y        |                |       | 5              | 1     |
| F395Y        |                |       | 1              | 1     |
| Y493H        |                |       | 49             | 5     |
| R539T        |                |       | 44             | 7     |
| I543T        |                |       | 24             | 2     |
| V568G        |                |       | 5              | 1     |
| D584V        |                |       | 2              | 2     |
| H719N        |                |       | 1              | 1     |
| <b>Total</b> | <b>98</b>      |       | <b>398</b>     |       |

## References

- 1 Takala-Harrison, S. *et al.* Genetic loci associated with delayed clearance of *Plasmodium falciparum* following artemisinin treatment in Southeast Asia. *Proceedings of the National Academy of Sciences of the United States of America* **110**, 240-245, doi:10.1073/pnas.1211205110 (2013).
- 2 Bethell, D. *et al.* Artesunate dose escalation for the treatment of uncomplicated malaria in a region of reported artemisinin resistance: a randomized clinical trial. *PLoS One* **6**, e19283, doi:10.1371/journal.pone.0019283 (2011).
- 3 Hien, T. T. *et al.* In vivo susceptibility of *Plasmodium falciparum* to artesunate in Binh Phuoc Province, Vietnam. *Malaria journal* **11**, 355, doi:10.1186/1475-2875-11-355 (2012).
- 4 Mayxay, M. *et al.* No evidence for spread of *Plasmodium falciparum* artemisinin resistance to Savannakhet Province, Southern Laos. *The American journal of tropical medicine and hygiene* **86**, 403-408, doi:10.4269/ajtmh.2012.11-0497 (2012).
- 5 Kyaw, M. P. *et al.* Reduced susceptibility of *Plasmodium falciparum* to artesunate in southern Myanmar. *PLoS One* **8**, e57689, doi:10.1371/journal.pone.0057689 (2013).
- 6 Dondorp, A. M. *et al.* Artemisinin resistance in *Plasmodium falciparum* malaria. *N Engl J Med* **361**, 455-467 (2009).
- 7 Phyto, A. P. *et al.* Emergence of artemisinin-resistant malaria on the western border of Thailand: a longitudinal study. *Lancet*, doi:10.1016/S0140-6736(12)60484-X (2012).
- 8 Cheeseman, I. H. *et al.* A major genome region underlying artemisinin resistance in malaria. *Science* **336**, 79-82, doi:10.1126/science.1215966 (2012).
- 9 Amaratunga, C. *et al.* Artemisinin-resistant *Plasmodium falciparum* in Pursat province, western Cambodia: a parasite clearance rate study. *The Lancet infectious diseases* **12**, 851-858, doi:10.1016/S1473-3099(12)70181-0 (2012).
- 10 Miotto, O. *et al.* Multiple populations of artemisinin-resistant *Plasmodium falciparum* in Cambodia. *Nature Genetics*, doi:10.1038/ng.2624 (2013).
- 11 Ashley, E. A. *et al.* Spread of artemisinin resistance in *Plasmodium falciparum* malaria. *The New England Journal of Medicine* **371**, 411-423, doi:10.1056/NEJMoa1314981 (2014).

## Supplementary Note

### Identification of founder populations in Vietnam and Cambodia

To identify populations in Vietnam, we analysed a set of 288 samples: 205 from Vietnam (VN), 48 from northeast Cambodia (NEKH) and 35 from Laos (LA). The Cambodia and Laos parasites were included in the analysis as populations of parasites genetically similar to those in Vietnam, but generally sensitive to artemisinin. The ADMIXTURE-based method (described in Methods) was run for  $K = 3 \dots 8$ , and the resulting labels were used for group assignment, leading to the identification of seven clusters, labelled VN-C and VN-F01 to VN-F06, as well as an “unclassified” group VN-U (Supplementary Figure 11). Cluster VN-C was deemed to represent a core population, due to its consistent grouping with the NEKH and LA populations. Clusters VN-F05 and VN-F06, observed to be unstable in their aggregation with groups of different ancestries (Supplementary Figure 12), were discarded and their samples reassigned to VN-U. The remaining populations (VN-F01 to VN-F04) were tested for evidence of founder effects. All candidate populations had high numbers of differentiated SNPs when compared to VN-C, although this number was considerably lower in VN-F02 ( $n = 253$ ) than in other populations (Supplementary Table 6). All clusters were also found to clearly correspond to groups of PCoA outliers (Supplementary Figure 4).

In Cambodia, the number of populations was expected to be high since at least four populations were previously identified in West and Northeast Cambodia, and samples from a new sampling region of the country (Preah Vihear Province, North Cambodia) were analysed for the first time in this study. Accordingly, ADMIXTURE was run for  $K = 3 \dots 16$ . However, we found that at all  $K \geq 12$ , newly identified groups either were too small or emerged in the wild-type population without marked differentiation in PCoA plots. Hence, we performed group assignments using ancestry results for  $K = 3 \dots 11$ , identifying a core population KH-C (largely consisting of samples from Northeast Cambodia included in the previously identified KH1 core population<sup>1</sup>), seven candidate founders populations in west Cambodia (WKH-F01 to WKH-F07) and three in north Cambodia (NKH-F01 to NKH-F03), as well as an “unclassified” group KH-U (Supplementary Figure 13). The smaller clusters KH-F06 and KH-F07 comprised samples unclassified for  $K \leq 6$ , as well as samples that grouped with KH-F03 at  $K = 6$  (Supplementary Figure 14). In addition, PCoA plots showed that these two clusters did not separate clearly from the core population in the first nine principal components (data not shown). Hence, KH-F06 and KH-F07 were disregarded, and their samples reassigned to KH-U. PCoA also showed that the KH-F05 cluster did not separate along any principal component, and

$F_{ST}$  analysis showed a very low number of highly differentiated SNPs between this cluster and KH-C ( $n = 49$ ), suggesting that KH-F05 may represent a core population, or an admixed derivative. Thus, KH-F05 was also excluded from the current analysis, and its samples added to VN-U. All remaining candidate founder populations (WKH-F01 to WKH-F04, and NKH-F01 to NKH-F03) were observed to separate from KH-C in PCoA plots (Supplementary Figure 5), and therefore retained for analysis.

## References

- 1 Miotto, O. *et al.* Multiple populations of artemisinin-resistant *Plasmodium falciparum* in Cambodia. *Nature Genetics*, doi:10.1038/ng.2624 (2013).
